1 **Population genomics of the island thrush elucidates one of earth's great archipelagic**  
2 **radiations**

3  
4 Andrew Hart Reeve<sup>a,\*</sup>, Graham Gower<sup>b,†</sup>, José Martín Pujolar<sup>a,c</sup>, Brian Tilston Smith<sup>d</sup>, Bent  
5 Petersen<sup>e,f</sup>, Urban Olsson<sup>g,h</sup>, Tri Haryoko<sup>i</sup>, Bonny Koane<sup>j</sup>, Gibson Maiah<sup>j</sup>, Mozes P. K. Blom<sup>k</sup>,  
6 Per G. P. Ericson<sup>l</sup>, Martin Irestedt<sup>l</sup>, Fernando Racimo<sup>b</sup>, Knud Andreas Jønsson<sup>a</sup>

7  
8  
9 *<sup>a</sup>Natural History Museum of Denmark, University of Copenhagen, DK-2100 Copenhagen Ø,*  
10 *Denmark*

11  
12 *<sup>b</sup>Lundbeck GeoGenetics Centre, The GLOBE Institute, University of Copenhagen, DK-1350*  
13 *Copenhagen K, Denmark*

14  
15 *<sup>c</sup>Centre for Ocean Life, DTU Aqua, Kemitorvet, Building 202, DK-2800 Kgs. Lyngby, Denmark*

16  
17 *<sup>d</sup>Department of Ornithology, American Museum of Natural History, Central Park West at 79<sup>th</sup>*  
18 *Street, New York, NY 10024, United States*

19  
20 *<sup>e</sup>Center for Evolutionary Hologenomics, The GLOBE Institute, University of Copenhagen, DK-*  
21 *1353 Copenhagen K, Denmark*

22  
23 *<sup>f</sup>Centre of Excellence for Omics-Driven Computational Biodiscovery, Faculty of Applied*  
24 *Sciences, AIMST University, Kedah, Malaysia*

25  
26 *<sup>g</sup>Gothenburg Global Biodiversity Centre, Box 461, SE-405 30 Gothenburg, Sweden*

27  
28 *<sup>h</sup>Department of Biological and Environmental Sciences, University of Gothenburg, Box 463, SE-*  
29 *405 30 Gothenburg, Sweden*

30

31 *<sup>i</sup>Museum Zoologicum Bogoriense Research Centre for Biology, National Research and*  
32 *Innovation Agency (BRIN), Jl. Raya Jakarta-Bogor Km 46, Cibinong 16911, Indonesia*

33

34 *<sup>j</sup>New Guinea Binatang Research Centre, Madang, Papua New Guinea*

35

36 *<sup>k</sup>Museum für Naturkunde Berlin, Leibniz Institut für Evolutions- und Biodiversitätsforschung,*  
37 *10115 Berlin, Germany*

38

39 *<sup>l</sup>Department of Bioinformatics and Genetics, Swedish Museum of Natural History, P.O. Box*  
40 *50007, SE-104 05 Stockholm, Sweden*

41

42

43 *\*To whom correspondence should be addressed:*

44 *Andrew Hart Reeve, Universitetsparken 15, Office 309, Natural History Museum of Denmark*  
45 *2100 Copenhagen Ø, Denmark*

46

47 *Email: [a.reeve@snm.ku.dk](mailto:a.reeve@snm.ku.dk)*

48

49

50 *†A. H. R. and G. G. contributed equally to this work*

51

52

53

54

55

56

57

58

59

60

61

## 62 **ABSTRACT**

63 Tropical islands are renowned as natural laboratories for evolutionary study. Lineage radiations  
64 across tropical archipelagos are ideal systems for investigating how colonization, speciation, and  
65 extinction processes shape biodiversity patterns. The expansion of the island thrush across the  
66 Indo-Pacific represents one of the largest yet most perplexing island radiations of any songbird  
67 species. The island thrush exhibits a complex mosaic of pronounced plumage variation across its  
68 range, and is arguably the world's most polytypic bird. It is a sedentary species largely restricted  
69 to mountain forests, yet it has colonized a vast island region spanning a quarter of the globe. We  
70 conducted comprehensive sampling of island thrush populations and obtained genome-wide SNP  
71 data, which we used to reconstruct its phylogeny, population structure, gene flow, and  
72 demographic history. The island thrush evolved from migratory Palearctic ancestors and radiated  
73 explosively across the Indo-Pacific during the Pleistocene, with numerous instances of gene flow  
74 between populations. Its bewildering plumage variation masks a biogeographically intuitive  
75 stepping stone colonization path from the Philippines through the Greater Sundas, Wallacea and  
76 New Guinea to Polynesia. The island thrush's success in colonizing Indo-Pacific mountains can  
77 be understood in light of its ancestral mobility and adaptation to cool climates; however, shifts in  
78 elevational range, degree of plumage variation and apparent dispersal rates in the eastern part of  
79 its range raise further intriguing questions about its biology.

80

81

## 82 **INTRODUCTION**

83 Tropical archipelagos are natural laboratories that have shaped scientific understanding of  
84 evolution and biogeography (Darwin 1859; Wallace 1869; Mayr 1942; MacArthur and Wilson  
85 1967; Ricklefs and Cox 1978; Mayr and Diamond 2001). The processes of colonization,  
86 speciation, and extinction are manifested in the modern distribution of their biotas, from  
87 evolutionary relics stranded on single islands, to ultra-mobile colonizers ubiquitous across entire  
88 archipelagos. At the intersection of these extremes are the 'great speciators' (Diamond et al.  
89 1976). These species (or lineages) are sufficiently dispersive to broadly colonize island systems,  
90 but paradoxically show distinct differentiation between island populations, indicating incipient  
91 speciation (and limited dispersal ability). This dynamic makes great speciators an alluring model  
92 for investigating how lineage expansion and diversification shape global biodiversity patterns

93 (Moyle et al. 2009; Jønsson et al. 2014; Pepke et al. 2019). Molecular phylogenetic studies  
94 (Moyle et al. 2009; Irestedt et al. 2013; Jønsson et al. 2014; Andersen et al. 2013, 2014, 2015;  
95 Pedersen et al. 2018; Kearns et al. 2020) have confirmed that great speciators represent rapid and  
96 geographically complex lineage radiations. However, those same attributes, combined with  
97 limited genetic sampling, have impeded precise evolutionary reconstruction of these radiations  
98 (though see Gwee et al. [2020] and Manthey et al. [2020]).

99 Another similar group overlaps with the great speciators: the montane species and  
100 lineages that have undergone expansive radiations across archipelagic highlands. This group  
101 represents a striking component of island species diversity in the Indo-Pacific that has held  
102 longstanding interest for researchers studying the formation of montane biodiversity (Rensch et  
103 al. 1930; Stresemann 1939; Mayr 1944; Mayr and Diamond 1976, 2001). The rapid mountain  
104 colonizations inferred for these species seem doubly improbable because dispersers must  
105 overcome both terrestrial lowland and water barriers. The group is therefore central to the  
106 question of how past climatic oscillations contributed to modern species distribution patterns via  
107 land bridge formation and elevational habitat shifts (Rensch et al. 1930; Stresemann 1939; Mayr  
108 1944; Mayr and Diamond 1976, 2001). Despite this, the great montane island radiations have  
109 never been subjected to detailed molecular study.

110 The island thrush (*Turdus poliocephalus*) is both an archetypal great speciator (Mayr and  
111 Diamond 2001) and one of the most prolific avian colonizers of island mountains (Clement and  
112 Hathaway 2000; Collar 2005). It is a sedentary species restricted to high montane forest across  
113 much of its range, yet it has radiated across islands spanning a 10,000 km distance from Sumatra  
114 to Samoa (Clement and Hathaway 2000; Collar 2005). Extraordinary differentiation between  
115 individual populations belies this evident propensity for inter-island dispersal. With some 50  
116 recognized subspecies, the island thrush is arguably the world's most polytypic bird (Clements et  
117 al. 2019; Gill et al. 2020), and certainly one of the most variably plumaged. Plumage color and  
118 pattern variation is both extreme and geographically incoherent, with similar color patterns often  
119 shared by widely separated populations (Peterson 2007). This variation — in addition to  
120 variation in sexual dimorphism, body size, and elevational distribution — have confounded  
121 interpretation of the island thrush's evolution. Preliminary molecular work (Voelker et al. 2007;  
122 Jones and Kennedy 2008; Nylander et al. 2008; Batista et al. 2020) has left open the question of  
123 whether the island thrush is even monophyletic, or an artificial assemblage of unrelated forms.

124 For this study, we conducted a comprehensive sampling of island thrush populations,  
125 both living and historically extinct, and additionally sampled its hypothesized sister clade  
126 (Voelker et al. 2007; Nylander et al. 2008) from East Asia. We obtained genome-wide shotgun  
127 sequencing data and used single nucleotide polymorphisms (SNPs) to reconstruct the island  
128 thrush's phylogeny, population structure, gene flow, and demographic history. This approach  
129 allows us to reveal, in unprecedented detail, the evolution of a great speciator.

130

131

## 132 **RESULTS**

133

### 134 **Phylogenetic analyses**

135

#### 136 **Phylogenetic analysis of SNP data**

137 Both genome-wide phylogenetic trees built using SNP data recover the island thrush as  
138 monophyletic (Figs. 1, S1). The topologies recovered by the pairwise distance (Fig. 1) and  
139 pairwise  $F_{ST}$  (Fig. S1) analyses differ in some details. The pairwise distance tree shows a  
140 sequential branching pattern that indicates an origin in the Philippines, an expansion through the  
141 Greater Sundas and Wallacea, and further eastward colonization of the Pacific via New Guinea.  
142 The pairwise  $F_{ST}$  tree is broadly similar, but suggests a more general western origin not  
143 necessarily centered in the Philippines.  $F_{ST}$  trees reflect differentiation due to genetic drift along  
144 different lineages, which is a function of time, lineage-specific variation in population sizes, and  
145 patterns of isolation between lineages. Our discussion below is mostly focused on the pairwise  
146 distance tree (Fig. 1), as it provides a more direct estimate of phylogenetic distances, i.e., without  
147 confounding by genetic drift. Additionally, cross-population heterozygosity levels (Results:  
148 Population structure and heterozygosity levels) and demographic reconstructions (Results:  
149 Demographic history inference using PSMC) both support the hypothesis that the island thrush  
150 expanded out of the Philippines. The pairwise distance tree is highly resolved, and the few nodes  
151 with < 100% bootstrap support appear to represent recent divergences between geographically  
152 proximate populations.

153 Five East Asian species constitute the sister clade of the island thrush. This in turn  
154 contains two subclades. The first contains *T. chrysolaus* and *T. celaenops*, which together have a

155 breeding range encompassing Japan, Sakhalin, and the Kuril Islands. The second contains *T.*  
156 *pallidus*, *T. feae*, and *T. obscurus*, which breed mostly on mainland East Asia.

157 Detailed maps are provided in Figs. S2a–c showing the geographic distribution of island  
158 thrush populations and their phylogenetic relationships as recovered by the pairwise distance  
159 analysis. Island thrush Clades A, B and C (Fig. 1) are composed of populations from the  
160 Philippines. Clade A represents the Mindoro population, *T. p. mindorensis*. Clade B contains *T.*  
161 *p. thomassoni* from northern Luzon and an undescribed population from Sibuyan. Clade C  
162 contains 1) a subclade from the central Philippines islands of Negros (*T. p. nigrorum*) and Panay  
163 (undescribed); and 2) four populations from disjunct mountain ranges across Mindanao,  
164 including an undescribed population from Mt. Busa in the island’s far south.

165 In Clade D, *T. p. erythropleurus* of Christmas Island in the Indian ocean is sister to a  
166 Wallacean group including *T. p. celebensis* from Sulawesi and two sister taxa on Timor. Clade E  
167 spans the Greater Sundas islands of Borneo, Java, and Sumatra. The Bornean population (*T. p.*  
168 *seebohmi*) is sister to the rest of the subclade, and Sumatran populations are embedded among  
169 Javan populations. The overall pattern indicates a southward spread from Borneo into eastern  
170 Java, followed by westward colonization across Java and into Sumatra.

171 Further eastward colonization into New Guinea appears to have proceeded via Seram in  
172 the Moluccas, represented by *T. p. deningeri* (Clade F). The relationships of *T. p. deningeri* with  
173 populations further west suggest that the island thrush may have crossed Wallace’s Line twice —  
174 either two eastward colonizations, or an eastward colonization followed by a westward back-  
175 colonization.

176 More recently, four clades diverged representing populations from New Guinea, the  
177 Bismarck Archipelago, and the Solomon Islands. Clade G contains New Guinea populations; *T.*  
178 *p. versteegi* from the west of the island is sister to more easterly populations, including the small  
179 offshore island of Karkar. Clade H contains populations from the Bismarcks. The uncollected  
180 population on the relatively large island of New Britain is not included; and we recover an  
181 unexpected sister relationship between the widely separated Tolokiwa and Mussau populations.  
182 Clade I comprises the Bougainville population, and Clade J contains populations further  
183 southeast on Kolombangara and Guadalcanal.

184 Two large sister clades (Clades K and L) represent broad expansions into the Pacific.  
185 Clade K is distributed across southern Melanesia, while Clade L represents an even broader

186 radiation across southern Melanesia, remote Tasman Sea islands, and Samoa. Sister to the rest of  
187 Clade K is the population from Rennell in the southern Solomon Islands. The rest of the clade is  
188 mostly distributed across Vanuatu, but two populations lie outside Vanuatu's central islands. The  
189 phylogenetic position of the extinct *T. p. mareensis* of Maré in New Caledonia's Loyalty Islands  
190 is unexpected, as other populations from New Caledonia and the southernmost islands of  
191 Vanuatu belong to Clade L. The clade also reaches Temotu, north of Vanuatu (*T. p.*  
192 *vanikorensis*). Plumage variation within Clade K is subtle, and three subspecies are not  
193 recovered as monophyletic: *T. p. becki*, *T. p. malekulae*, and *T. p. placens* (the latter including  
194 populations both from Clades K and L).

195 Sister to the rest of Clade L are populations from Gaua and Vanua Lava in the Banks  
196 Islands of northern Vanuatu. These populations are oddly interspersed between populations of *T.*  
197 *p. vanikorensis* (Clade K) spanning northern Vanuatu and Temotu. The next clade to diverge  
198 represents a distributional leap, encompassing populations in some of the southernmost islands  
199 of Vanuatu (Erromango, Tanna, Futuna), as well the extinct population on Lifou in the Loyalty  
200 Islands. Our molecular results suggest that the undescribed Futuna population should be assigned  
201 to subspecies *pritzbueri*, which otherwise occurs on Tanna (and previously on Lifou). The next  
202 branch of the tree represents the extinct Grande Terre (New Caledonia) population of *T. p.*  
203 *xanthopus*. The remaining branches of Clade L represent the most extreme long-distance  
204 colonizations that can be inferred for the island thrush. The first branch represents a colonization  
205 of the distant Tasman Sea islands of Norfolk (the nominate subspecies) and Lord Howe (*T. p.*  
206 *vinitinctus*). Both taxa are now extinct. The second branch represents colonization of Fiji, where  
207 five subspecies form a clade, and the final branch represents colonization of Samoa (subspecies  
208 *samoensis*), which marks the eastern limit of the island thrush's radiation across the Pacific.

209

### 210 **Phylogenetic analysis of mitochondrial genome data**

211 The phylogenetic analysis of mitochondrial genome data (Fig. S3) also recovers the island thrush  
212 as monophyletic. The BEAST date estimate for divergence of the the island thrush from its five-  
213 species sister clade is 2.4 Mya (95% HPD 2.0–2.8 Mya), and population divergence within the  
214 island thrush itself is estimated to have begun 1.3 Mya (95% HPD 1.1–1.5 Mya). The tree shows  
215 a sequential branching pattern that is roughly similar to the trees built with nuclear SNP data,  
216 again indicating a west-to-east stepping stone colonization pattern. However, while most nodes

217 are strongly supported (posterior probability  $\geq 0.99$ ), the topology of the mitogenome tree differs  
218 in many details from the nuclear trees, reflecting specific patterns of mitochondrial inheritance  
219 that are not recovered from the average autosomal tree. We stress that discordance between the  
220 mitochondrial tree and the nuclear trees is not unexpected, as the nuclear data encompass many  
221 distinct gene trees. The mitogenome tree does recover the same Greater  
222 Sundas/Wallacea/Christmas Island clade as the nuclear trees, as well as the same clade  
223 containing populations from New Guinea and all points east. These clades are both dated to  
224 about 0.8 Mya, indicating a very rapid radiation out of the Philippines that quickly reached  
225 Melanesia.

226

### 227 **Population structure and heterozygosity levels**

228 The PCAngsd MAP test suggests that six principal dimensions explain the population structure  
229 in the dataset, corresponding to 18.63% of the total variance (Fig. S4). Genetic correlation  
230 between pairs of individuals, which controls for individual variation in heterozygosity, is  
231 visualized in the heatmap in Fig. S5. Ancestry proportions for  $k=2$  to  $k=8$  putative ancestry  
232 components are illustrated in Fig. S6. These analyses suggest a genetic structure for the island  
233 thrush with strong differentiation between a western clade (Greater Sundas, Philippines,  
234 Wallacea) and an eastern clade (New Guinea and islands to the east). The eastern Clades K + L  
235 (Fig. 1) are heavily oversampled compared to the group's many smaller, early branching clades.  
236 This has the effect of overrepresenting variation within the eastern clade, while  
237 underrepresenting variation between the other clades. To test this interpretation, we reran the  
238 latent mixed-membership model analyses on a dataset that included the outgroup taxa. This  
239 resulting plot (Fig. S7) shows the outgroup taxa to be homogenous, with a single common  
240 ancestry component for  $k=2$  to  $k=6$  ancestors, despite their deep divergences. The ingroup  
241 analysis (Fig. S6) suggests mixed ancestry in a number of populations, notably *T. p. mindorensis*  
242 (Mindoro, Philippines), *T. p. deningeri* (Seram, Moluccas), *T. p. seebohmi* (Borneo), *T. p.*  
243 *stressemanni* (east-central Java), and many populations in the islands east of New Guinea. While  
244 ascertainment bias due to uneven sampling is potentially problematic (Puechmaille 2016;  
245 Lawson et al. 2018), explicit tests for gene flow using D-statistics (Results: Gene flow) support  
246 multiple gene flow events. Heterozygosity levels of individuals are visualized in Fig. 2; there is a



247 broad pattern of west-to-east decline, and levels tend to be higher in populations from larger  
248 islands.

249

## 250 **Gene flow**

251 Of the 67,525 calculated  $D_b(C)$  statistics, 15,055 are significant at FWER < 0.05 (Fig. 3). The  
252 results indicate widespread ancient and recent gene flow within the island thrush and its five-  
253 species sister clade. Gene flow across early branches of the tree has in many cases left a visual  
254 pattern (Fig. 3) of long rows of similarly shaded cells, with the genetic signature of early  
255 admixture being inherited by descendent populations. Ancient gene flow is inferred within the  
256 island thrush's sister clade, and also between members of this sister clade and the ancestral island  
257 thrush lineage. This is particularly evident in e.g. *T. pallidus*, and in the last common ancestor  
258 (LCA) of *T. celaenops* and *T. chrysolais*. Ancient gene flow is also inferred within the island  
259 thrush itself. We detected substantial admixture between the ancestral lineages that gave rise to  
260 populations in 1) the Greater Sundas, 2) Wallacea, and 3) islands from the Moluccas east to  
261 Polynesia. Admixture is also widespread among the deeper ancestral nodes of the clades  
262 representing populations east of New Guinea (Clades H–L in Fig. 1). The results further indicate  
263 many instances of more recent gene flow between island thrush populations. Recent gene flow is  
264 much more prevalent among populations east of New Guinea, with gene flow inferred between  
265 several populations in the Bismarcks and Solomons (e.g., *T. p. heinrothi* and *T. p. beehleri*), and  
266 on many occasions between Clades K and L in the far east and south of the island thrush's range.  
267 The few cases of inferred recent gene flow among western populations include those between  
268 e.g. *T. p. katanglad* (central Mindanao) and *T. p. malindangensis* (northwest Mindanao); and  
269 between *T. p. stresemanni* (east-central Java) and the LCA of *T. p. javanicus* and *T. p. fumidus*  
270 (west and central Java).

271 Patterns for certain populations suggest unlikely gene flow events. For example, the  
272 pattern for *T. p. efatensis* (Nguna, Vanuatu) implies numerous individual admixtures with most  
273 eastern island thrush populations, as well as the island thrush's sister clade. This often occurs  
274 when two individuals from the same population (or two very closely-related populations) were  
275 sampled. In pairs belonging to *T. p. thomassoni*, *T. p. erythropleurus*, *T. p. celebensis*, and the  
276 aforementioned *T. p. efatensis*, one member of the pair shows an unrealistic pattern of gene flow,  
277 while the other does not. The individuals that constitute these pairs differ from one another quite

278 markedly in data quality (Supplementary File 5), and these disparities likely caused the  
279 unrealistic patterns in the analysis results.

280

### 281 **Demographic history inference using PSMC**

282 We used PSMC to infer the demographic histories of 60 individuals, representing 38 island  
283 thrush subspecies and six outgroup taxa (including *T. [poliocephalus] niveiceps*). We excluded  
284 individuals with sequencing depth < 10 (n = 16). The generated plots are presented in Fig. 4 and  
285 Supplementary File 4. The analyses cover the time period from c. 10 Mya to 10 Kya; the dates  
286 and effective population sizes ( $N_e$ ) reported here should be considered approximate, and  
287 reflective of temporal patterns of coalescent intensity (reflecting population structure), rather  
288 than census population sizes. However, the points at which PSMC curves diverge for different  
289 species correspond closely with the divergence time estimates from our mitochondrial genome  
290 tree (Fig. S3), and this guides our interpretation of the PSMC plots.

291 The common ancestral lineage had an estimated  $N_e$  of 600,000 individuals in the late  
292 Miocene. The outgroup taxon *T. merula* diverged from this lineage at 5–6 Mya, and maintained a  
293 fluctuating  $N_e$  of 200,000 to 1,000,000 until 10 Kya. The outgroup taxon *T. niveiceps* then  
294 diverged from the the island thrush ancestral lineage at c. 5 Mya, and maintained a fairly stable  
295 effective population size of 300,000–700,000 until 10 Kya. The ancestral island thrush lineage  
296 increased steadily from that point. The island thrush diverged from its sister clade at 2 Mya,  
297 which coincides with a  $N_e$  peak at 1,000,000. Species within the sister clade experienced a  
298 continued rise in  $N_e$  before diverging from one another slightly before 1 Mya. The island  
299 thrush's  $N_e$  dropped steeply from its peak at 2 Mya. Philippines populations'  $N_e$  curves started to  
300 subtly diverge at 1 Mya, and declined at a lower rate than the remainder of the island thrush  
301 lineage. Non-Philippines island thrushes declined steeply until reaching a low  $N_e$  of 50,000–  
302 60,000 at 300 Kya; western clades began to stabilize slightly earlier than eastern clades. There is  
303 a poorly defined second hump of effective population growth and decline, which peaks, very  
304 roughly, at 100 Kya.

305 The curves present a very consistent overall pattern from 10 Mya to c. 300 Kya. The loss  
306 of concordance between 300 and 10 Kya likely reflects 1) that many populations were following  
307 variable individual trajectories at this point; and 2) that PSMC unable to adequately resolve very  
308 recent coalescent events (Li & Durbin, 2011).

309

### 310 **Geographic distance vs. genetic distance**

311 We found a significant positive relationship between geographic distance and genetic distance  
312 (Fig. S8;  $r^2 = 0.47$ ,  $p < .001$ ), indicating isolation by distance (Slatkin 1987, 1993) and  
313 supporting a stepping stone mode of colonization (Cibois et al. 2011; Irestedt et al. 2013).

314

### 315 **Colonization in light of Pleistocene land bridge formation**

316 Populations with inferred Pleistocene land bridge connections share close phylogenetic  
317 relationships, indicating that Pleistocene cooling aided inter-island colonization. Results are  
318 presented in Fig. S9.

319

### 320 **Sexual dichromatism**

321 Sexually dichromatic populations are scattered across the island thrush tree (Fig. S10), indicating  
322 that sexual dichromatism was gained and lost on numerous occasions.

323

324

## 325 **DISCUSSION**

326 The island thrush represents a monophyletic island radiation that rapidly acquired its expansive  
327 geographic distribution within an estimated 1.3–2.4 million years. Its extreme plumage variation  
328 has obscured a biogeographically intuitive west-to-east stepping stone pattern of colonization  
329 from the Philippines through the Greater Sundas, Wallacea and New Guinea to Polynesia. With  
330 an aim to better understand the nature of archipelagic radiations and how they generate  
331 biodiversity, we here discuss the island thrush's evolutionary origins, spatiotemporal radiation,  
332 population admixture, demographic history, and ecological and morphological variability.

333

### 334 **Evolutionary and geographic origins**

335 The island thrush evolved from a clade of migratory *Turdus* thrushes with Palearctic/Sino-  
336 Himalayan breeding distributions (Nylander et al. 2008; Batista et al. 2020). Its sister clade  
337 comprises five East Asian species (Fig. 1) that range from short-distance partial migrants to  
338 long-distance migrants (Collar 2005). Four of five of these species are wholly or partly restricted  
339 to mountains within their breeding ranges (Collar 2005). Given this evolutionary background, the

340 island thrush's preference for cool (montane) habitat, and its evident ability to move across long  
341 distances, can be considered ancestral traits. The island thrush diverged from its continental  
342 sister clade c. 2.4 Mya, and began diversifying across the Indo-Pacific archipelagos c. 1.3 Mya  
343 (Fig. S3). Our results indicate that the first extant populations to be established were those from  
344 the Philippines, which correspond to the deepest splits in the tree (Fig. 1). How the ancestral  
345 island thrush reached the Philippines is unclear. Given that its ancestors were likely Palearctic  
346 migrants, and that two species from its sister clade winter in the Philippines, it is possible that  
347 colonization occurred via settling down of wintering birds (Rolland et al. 2014). However, the  
348 island thrush population on Mindoro is sister to the rest of the complex (Fig. 1) and appears to be  
349 one of the first established. Mindoro is one of the main arrival points for colonizers of the  
350 Philippines from Borneo (Diamond and Gilpin 1983; Jones and Kennedy 2008), which might  
351 suggest that a now-extinct population from the Greater Sundas colonized the Philippines.

352

### 353 **Spatiotemporal dynamics of the radiation**

354 Diversification of the island thrush occurred during the second half of the Pleistocene, starting c.  
355 1.3 Mya (Fig. S3). This is in line with dating estimates for other great speciators, which also  
356 radiated explosively during the Pleistocene (Moyle et al. 2009; Irestedt et al. 2013; Jønsson et al.  
357 2014; Andersen et al. 2013, 2014, 2015; Pedersen et al. 2018; Kearns et al. 2020). The sequential  
358 branching pattern of the island thrush tree (Fig. 1) suggests that it expanded across most of its  
359 range following a stepping stone colonization path. Starting in the Philippines, it expanded into  
360 the Greater Sundas and Wallacea, colonized New Guinea and islands of Northern Melanesia, and  
361 then underwent overlapping radiations in southern Melanesia. In one of these radiations (Fig. 1,  
362 Clade L), the pattern of incremental advances gives way to long-distance oversea dispersals to  
363 reach far-away outposts in the Tasman Sea, Fiji, and Samoa. The overall stepping stone  
364 colonization process is supported by our regression analysis showing a positive relationship  
365 between geographic and genetic distance (Fig. S8). A similar pattern has been found for some  
366 other Indo-Pacific bird radiations (Cibois et al. 2011; Irestedt et al. 2013; Pedersen et al. 2018),  
367 but not all (Ericson et al. 2019).

368 Many of the islands that the island thrush inhabits have never shared subaerial  
369 connections (Fig. S9), so it is clear that repeated oversea colonizations have driven its current  
370 distribution. Nevertheless, water barriers have impeded its dispersal, and land bridge formation

371 via Pleistocene cooling facilitated colonization. This is evident from the findings that populations  
372 are usually most closely related to other populations from the same island, and that populations  
373 connected by land bridges during Pleistocene glacial periods are in all cases closely related (Fig.  
374 S9). We find that the downslope expansion of montane forest habitat during the Pleistocene  
375 (Hewitt 2000, Garg et al. 2020) did not connect different populations on the same island (e.g.  
376 Mindanao, Greater Sundas, New Guinea) sufficiently to erase relatively deep genetic structure  
377 among them (Fig. S3).

378

### 379 **Gene flow between populations**

380 The island thrush's impressive dispersal capacity allowed it to repeatedly colonize new islands,  
381 but has also led to extensive admixture between established populations (Fig. 3). In western  
382 populations (Clades A–G in Fig. 1), most gene flow events appear to date back to the early  
383 phases of the radiation, when there was also admixture with the species' East Asian sister clade.  
384 Gene flow between island populations to the east and south of New Guinea (Clades H–L in Fig.  
385 1) is more recent and widespread. The many instances of gene flow between different branches  
386 of the island thrush phylogeny can help explain why topological inconsistencies exist across the  
387 phylogenetic trees (Figs. 1, S1, and S2).

388         The gene flow patterns provide new insight into the paradox of the great speciators  
389 (Diamond et al. 1976). A prominent hypothesis is that great speciators possess a uniformly  
390 moderate capacity for dispersal that is sufficient for colonization of new islands, but not  
391 sufficient for genetic and phenotypic homogenization across established populations (Diamond  
392 et al. 1976; Mayr and Diamond 2001). This is not the case in the island thrush: in recent times,  
393 population admixture and colonizations across deep-water barriers are much more frequent in  
394 eastern populations than in western populations. Another hypothesis is that the dispersal capacity  
395 of great speciators changes over time, usually imagined as an initial burst of rapid colonization  
396 followed by a sedentary phase of differentiation (Diamond et al. 1976). This model does not fit  
397 the island thrush as a whole, again because of the different dispersal patterns of eastern and  
398 western populations. The island thrush radiation might be better characterized as a rapidly  
399 advancing colonization front that leaves more sedentary populations in its wake. This is a  
400 dynamic seen (at much shorter timescales) in the spread of the invasive cane toad (*Rhinella*  
401 *marina*) across Australia (Phillips et al. 2007), where high dispersiveness is selected for at the

402 edge of the expansion (Phillips et al. 2010). A similar mechanism could operate in the island  
403 thrush, assuming that island populations are founded by exceptionally dispersive individuals, but  
404 that dispersiveness is selected against in established populations because oversea dispersers leave  
405 those populations.

406

### 407 **Demographic history and genetic variation**

408 The demographic history of the island thrush, and the modern genetic variation shown by its  
409 constituent populations, further elucidate its stepping stone colonization across the Indo-Pacific.  
410 The PSMC analyses (Fig. 4) imply that the lineage that spawned the island thrush and its sister  
411 clade experienced continuous growth in effective population size ( $N_e$ ) during the Pliocene and  
412 early Pleistocene, until beginning to diverge c. 2 Mya. This build-up was likely accompanied by  
413 range expansion across East Asia, as reflected by the clade's current broad distribution across the  
414 region. As part of this expansion, the island thrush entered the Indo-Pacific archipelagos and  
415 experienced a steep  $N_e$  decline as gene flow with the continental lineage was lost. A similar rise-  
416 and-fall  $N_e$  dynamic is seen in *T. celaenops*, which colonized isolated Japanese islands (Fig. 4a),  
417 and in snowy-browed flycatcher (*Ficedula hyperythra*) (Pujolar et al. 2022), another passerine  
418 supercolonizer of island mountains with likely origins on the Asian mainland (Moyle et al.  
419 2015). This pattern suggests that mainland population build-up can trigger archipelagic  
420 radiations. The oldest island thrush populations in the Philippines declined less steeply than other  
421 groups (Fig. 4b), and remaining western populations slowed their decline slightly earlier than  
422 eastern populations (Figs. 4c, 4d). This is likely because populations that were established earlier  
423 could regenerate genetic diversity earlier. The substantial population increases estimated for  
424 most populations starting c. 300 Kya are technical artifacts reflecting the limitations of the  
425 PSMC method at recent timescales (Li & Durbin, 2011; Nadachowska-Brzyska et al., 2015,  
426 2016); most modern populations actually have low heterozygosity levels.

427 Heterozygosity levels of modern island thrush populations (Fig. 2) can be understood in  
428 light of the serial founder effect (Ramachandran et al. 2005). The oldest populations in the  
429 Philippines show the highest heterozygosity, probably retained in large part from the ancestral  
430 continental lineage. Repeated colonizations (and founder events) resulted in a general west-to-  
431 east pattern of decreasing heterozygosity. Most deviations from this pattern can be explained by  
432 island size (e.g., regionally low heterozygosity in small central Philippines island populations

433 and regionally high heterozygosity in the large island of New Guinea). The most conspicuous  
434 exception to the overall pattern is the remarkably high heterozygosity of *T. p. stresemanni* of  
435 east-central Java, contrasted against the exceptionally low heterozygosity of the other six Javan  
436 and Sumatran subspecies. The analyses of population structure (Fig. S6) and gene flow (Fig. 3)  
437 both suggest that this is due to admixture of *T. p. stresemanni* with the island thrush lineage  
438 now inhabiting the northern Philippines.

439

#### 440 **Elevational distribution**

441 The island thrush is mostly restricted to mountains in the western part of its range from Sumatra  
442 to the Solomons. Here it rarely occurs below 1000 masl, but it reaches sea level on Christmas  
443 Island in the Indian Ocean, Mussau in the Bismarck Archipelago, and Rennell in the southern  
444 Solomon Islands (MacKinnon and Philipps 1993; Coates and Bishop 1997; Kennedy et al. 2000;  
445 Dutson 2011; Beehler and Pratt 2016). By contrast, it occurs down to sea level, or nearly so, on  
446 the generally small and low islands in the Tasman Sea, southern Melanesia, and Polynesia (Pratt  
447 et al. 1987; Collar 2005; Dutson 2011). Preference for cool (montane) climates can be regarded  
448 as an ancestral trait, based on the ecology of the island thrush's close relatives (see above), and  
449 because montane populations correspond to the deepest splits in the island thrush phylogeny  
450 (Fig. 1). Following this interpretation, its variable elevational distribution is the result of three  
451 individual shifts (or expansions) into the lowlands (on Christmas Island, Mussau, and island  
452 south and east of the core Solomons). However, disentangling the mechanisms driving the island  
453 thrush's elevational distribution is not straightforward. Diamond (1975) argues that populations'  
454 elevational ranges are governed by diffuse competition, being pushed into the mountains on  
455 islands with high bird species richness in the lowlands. However, those isolated islands with  
456 impoverished bird faunas (e.g. southern Melanesia, Tasman Sea Islands, Polynesia) also lack key  
457 nest predators such as *Rattus* rats and *Boiga* snakes, or did at least prior to anthropogenic  
458 introductions. An alternative explanation is therefore that nest predation pressure restricts some  
459 populations to mountains (Skutch 1985; Boyle 2008; Jankowski et al. 2013), which could  
460 explain the susceptibility of lowland island thrush populations to introduced rats (Collar 2005,  
461 Villard et al. 2019). Either mechanism could explain the island thrush's striking absence from  
462 Australia, which is highly biodiverse but mostly lacks tall mountains.

463

## 464 **Plumage color**

465 Phylogenetic relationships alone do not explain the complex color variation in the island thrush,  
466 as populations that are not closely related often show convergent plumage types (e.g. *T. p.*  
467 *deningeri* of the Moluccas and *T. p. albifrons* / *T. p. pritzbueri* of southern Melanesia).  
468 Nevertheless, there is phylogenetic signal in its range-wide (male) plumage variation (Fig. 5).  
469 The three major clades from the Philippines represent some of the oldest populations (Fig. 1),  
470 and encompass a few distinct plumage types. Populations from the Greater Sundas, Christmas  
471 Island, and Wallacea west of Seram (Clades D and E in Fig. 1) are dark brown birds that vary  
472 primarily in the extent of reddish coloration of the underparts. The Seram population marks a  
473 shift to blackish body plumage, but has a white head. Overall blackish plumage — with varying  
474 degrees of white in the vent and undertail coverts — is common to most of the rest of the  
475 complex, from New Guinea to southern Melanesia. The striking exception from this pattern is  
476 the eastern Clade L (Fig. 1), which encompasses massive plumage variation, even among  
477 geographically and genetically similar Fiji populations. Based on this clade's broad distribution  
478 in the Pacific, it is exceptionally dispersive, but it is not clear if or how this might be related to  
479 the pronounced variation in plumage. Overall, plumage variation is a poor proxy for  
480 phylogenetic distance in the island thrush.

481 The phylogenetic relationships of island thrush populations reveal numerous gains and  
482 losses of sexual dichromatism (Fig. S10). These transitions appear to occur haphazardly across  
483 the tree, having no obvious association with geographic region, island size, or elevational range.  
484 All members of the island thrush's sister clade are sexually dichromatic (Collar 2005), as are  
485 most members of the broader Palearctic *Turdus* clade that it belongs to (Batista et al. 2020).  
486 Together with the fact that sexual dichromatism in the island thrush is mostly weak (Peterson  
487 2007), this is consistent with a general pattern that island populations are less sexually dimorphic  
488 than their congeneric mainland populations (Omland 1997; Badyaev and Hill 2003). The  
489 seemingly random appearance and disappearance of sexual dichromatism may be attributable to  
490 repeated founder effects (Omland 1997; Kearns et al. 2020).

491

## 492 **Conclusion**

493 Our study provides a detailed phylogenetic reconstruction of a great speciator. We demonstrate  
494 that the island thrush represents one of the most simultaneously explosive, expansive, and



495 phenotypically diverse radiations among birds. The island thrush evolved from Palearctic  
496 ancestors and rapidly island hopped across a quarter of the globe, a journey that was facilitated  
497 by Pleistocene land bridge formation, but driven by repeated oversea dispersals. This stepping  
498 stone colonization left a clear signature of declining genetic variation from west to east. While  
499 representing extreme aspects of an archipelagic radiation, the island thrush provides a useful  
500 model for understanding Pleistocene interchange between Eurasian and Australo-Papuan faunas,  
501 and the role of mountains as pathways for temperate lineages to enter the tropics.

502

503

## 504 **MATERIALS AND METHODS**

505

### 506 **Taxon sampling**

507 Modern taxonomic treatments (Dickinson and Christidis 2014; Clements et al. 2019; Gill and  
508 Rasmussen 2020) recognize 50 island thrush subspecies, with slight variations in delimitation of  
509 a few forms. Aiming for comprehensive geographic and taxonomic coverage, we sampled 71  
510 individuals representing 48 subspecies *sensu* IOC v10.2 (Gill and Rasmussen 2020)  
511 (Supplementary File 1). We sampled five recently extinct populations from the Pacific, as well as  
512 four undescribed populations from the Philippines and Vanuatu. Missing are *T. p. mayonensis* (s  
513 Luzon, Philippines) and the newly described *T. p. sukahujan* from Taliabu in Indonesia (Rheindt  
514 et al. 2020). We also sampled outside the island thrush complex to test its monophyly and  
515 elucidate its evolutionary background. We included the five members of its hypothesized east-  
516 Asian sister clade (Voelker et al. 2007; Nylander et al. 2008; Batista et al. 2020); the Sulawesi  
517 thrush (*Turdus* [*Cataponera*] *turdoides*), the island thrush's Wallacean congener (Reeve et al.  
518 2022); and the Taiwan thrush (*T. [poliocephalus] niveiceps*), removed from the island thrush  
519 complex on the basis of Nylander et al. (2008), but with uncertain phylogenetic placement. The  
520 common blackbird (*T. merula*), which diverged from the island thrush c. 5 Mya (Batista et al.  
521 2020), was sampled to generate a *de novo* assembled reference genome (see Materials and  
522 methods: Bioinformatics: *de novo* reference genome assembly).

523

### 524 **Library preparation and sequencing**

525 We extracted genomic DNA from toepad samples (n = 59) and from fresh blood and tissue  
526 samples (n = 19). Protocol for DNA extraction from toepad samples followed Irestedt et al.  
527 (2006). We followed the protocol of Meyer and Kircher (2010) to create sequencing libraries  
528 suitable for Illumina sequencing of toepad DNA extracts. Library preparation included blunt-end  
529 repair, adapter ligation, and adapter fill-in, followed by four independent index PCRs. The  
530 libraries were run on half a lane on Illumina HiSeq X, pooled at equal ratio with other museum  
531 samples. Genomic DNA was extracted from fresh samples with KingFisher Duo magnetic  
532 particle processor (ThermoFisher Scientific) using the KingFisher Cell and Tissue DNA Kit.  
533 Library preparation, using Illumina TruSeq DNA Library Preparation Kit, and sequencing on  
534 Illumina HiSeqX (2x151 bp) was performed by SciLifeLab. All raw reads generated for this  
535 study have been deposited at the NCBI Sequence Read Archive (SRA), accession number  
536 [pending].

537

## 538 **Bioinformatics**

539

### 540 ***de novo* reference genome assembly**

541 A *Turdus merula* reference genome for mapping was generated by SciLifeLab using Neutronstar  
542 (<https://github.com/nf-core/neutronstar>), a NextFlow pipeline for the *de novo* assembly of 10X  
543 Chromium linked reads. Neutronstar employs Supernova (Weisenfeld et al. 2017) for *de novo*  
544 assembly and uses BUSCO (Simão et al. 2015) and QUAST (Gurevich et al. 2013) to evaluate  
545 assembly quality. Assembly statistics are summarized in Table S1.

546

### 547 **Read cleaning and mapping**

548 Illumina sequencing reads were processed using a custom-designed workflow to remove adapter  
549 contamination, low-quality bases, and low-complexity reads (available at  
550 <https://github.com/mozesblom>). Overlapping read pairs were merged using PEAR (v.0.9.10;  
551 Zhang et al. 2014), and Super Deduper (v.1.4; Petersen et al. 2015) was used to remove PCR  
552 duplicates. Trimming and adapter removal was performed using TRIMMOMATIC (v.0.32;  
553 Bolger et al. 2014; default settings). The overall quality and length distribution of sequence reads  
554 was inspected using FASTQC (v.0.11.5; Andrews 2010), before and after the cleaning.

555 Cleaned reads were mapped to the reference using BWA-MEM (Li 2013), PCR  
556 duplicates were removed with Picard MarkDuplicates (Broad Institute 2019), and GATK's  
557 RealignerTargetCreator and IndelRealigner were used to realign reads around indels (McKenna  
558 et al. 2010) (mapping pipeline and scripts for subsequent analysis of the nuclear data are  
559 available from [https://github.com/grahamgower/island\\_thrush\\_scripts](https://github.com/grahamgower/island_thrush_scripts)). To avoid low-complexity  
560 reads and potential contamination, only reads with MAPQ  $\geq 30$  were retained, which resulted in  
561 a mean depth of coverage of  $11.77 \pm 3.69$ . The same pipeline was used to reconstruct  
562 mitochondrial genomes (mean depth of coverage  $396.44 \pm 314.27$ ). Reads were mapped to a  
563 reference mitochondrial genome sequence from *Turdus mandarinus* (Genbank accession no.  
564 NC\_028188). We then created consensus mitochondrial sequences for each individual using  
565 htsbox (<https://github.com/lh3/htsbox>).

566

### 567 **Post-mortem damage**

568 Many of our genetic samples derive from study skins collected in the early 20<sup>th</sup> century, and we  
569 therefore assessed post-mortem DNA damage patterns. This was done using condamage  
570 (<https://github.com/grahamgower/condamage>), which revealed considerable cytosine  
571 deamination in many individuals (Supplementary File 3). Condamage also implements an  
572 approach by Meyer et al. (2016) to inspect per-read patterns of deamination on one read end,  
573 conditional on there also being damage at the other end. In the case of a contaminated specimen,  
574 the conditional and unconditional deamination rates can differ, due to the unconditional  
575 proportion being calculated from both endogenous and exogenous reads, while the conditional  
576 proportion is calculated from (mostly) endogenous reads. Similarly, the DNA fragment length  
577 distributions for damaged versus undamaged reads can differ for contaminated specimens, as  
578 exogenous reads are typically introduced at the time of sample processing and sequencing, and  
579 are thus longer than the degraded endogenous reads. However, no contamination was identified  
580 from this investigation.

581

### 582 **Exclusion of sex-linked contigs**

583 Sex chromosomes can have vastly different mutation rates, recombination rates, and effective  
584 population sizes compared with autosomes. We therefore wanted to restrict genomic analyses to  
585 autosomal data. One approach to identify sex-linked contigs is to map a reference assembly to a

586 chromosome-level assembly of a closely related species. However, no such assembly was  
587 available for this purpose.

588 Under the assumption that reads are sampled from any given chromosome in proportion  
589 to the chromosome's length and copy number, we then expect that the proportion of reads that  
590 map to any given sex-linked contig will differ between the two sexes. Given that both males and  
591 females are represented in our dataset, the contigs may be stratified into Z-linked or autosomal,  
592 depending on the proportion of reads mapping to the contigs in the respective male and female  
593 cohorts. In principle, we could use read dosage to identify W-linked contigs as well, but the  
594 individual used to construct our reference was male, and thus the assembly does not contain any  
595 W-linked contigs.

596 We stratified the contigs with length > 100 kbp, using principal components analysis  
597 (PCA) applied to  $\mathbf{M}$ , an  $m \times n$  matrix of  $m$  contigs and  $n$  individuals, which has entries

598

$$\mathbf{M}_{ij} = \frac{N_{ij}}{\sum_k N_{kj}} / \frac{L_i}{\sum_k L_k},$$

599

600

601 where  $N_{ij}$  is the number of reads mapped to contig  $i$  in individual  $j$ , and  $L_i$  is the length of  
602 contig  $i$ . The contig length normalization follows from our earlier assumption that the number of  
603 reads mapping to a given contig will be proportional to its length. PCA was performed on the  
604 mean-centered covariance matrix of  $\mathbf{M}$ , which produced a clear separation of contigs into two  
605 clusters along PC2 (Fig. S11).

606 A well-known contributor to non-uniform sequencing coverage is an association between  
607 local GC% and sequencing depth (Benjamini and Speed 2012). By regressing PC1 against GC%,  
608 we determined that GC% is a contributor to the primary source of read dosage variation in our  
609 sample (Pearson  $R^2=0.30$ ,  $p=4.9e-66$ ). To correct for this, we separately regressed each  
610 individual column in  $\mathbf{M}$  against the contig GC proportions, then performed an additional PCA on  
611 the matrix of residuals. The GC-corrected PCA separated the contigs into two major groups  
612 along PC1 (Fig. S12), indicating that a systematic difference between two groups of contigs  
613 drives the remaining variation. We designated the smaller cluster of contigs, comprised of fewer  
614 nucleotides, as Z-linked, and the larger cluster as autosomal. The number of contigs for each  
615 group, and their total nucleotide count, are provided in Table S2.

616 To confirm that the two contig groups were indeed separating based on Z-chromosome  
617 copy number, we genetically sexed each individual using the autosomal and Z-linked contigs  
618 assigned from the GC-corrected PCA (Gower et al. 2019). Of the 65 individuals for which  
619 phenotypic sex information was available, 64 of the genetic sexes matched. We note that very  
620 similar results were obtained when using the non-GC-corrected PCA, but we restricted all further  
621 analyses to data mapped to the set of contigs identified as autosomal from the GC-corrected  
622 PCA. We also note that a similar method was recently developed by Nursyifa et al. (2021) to  
623 address the same problem we tackle here.

624

### 625 **SNP ascertainment and genotype likelihoods**

626 We obtained a set of candidate SNP sites by calling major and minor alleles using ANGSD  
627 (Korneliussen et al. 2014) with a SNP p-value cutoff of  $10^{-6}$ . We used only the individuals with  
628 average depth of sequencing greater than 10 (n=61). To reduce the impact of post-mortem  
629 damage in our ancient museum specimens, the set of sites was further filtered to exclude all  
630 transitions (C/T and G/A SNPs). Specifically, we used the following ANGSD parameters: -  
631 minMapQ 30 -minQ 20 -baq 2 -C 50 -uniqueOnly 1 -noTrans 1 -minInd 30 -GL 1 -doMaf 1 -  
632 doGlf 2 -doMajorMinor 1 -doSaf 1 -SNP\_pval 1e-6. This yielded 8,476,511 SNPs across the  
633 autosomal contigs, at a density of approximately one SNP per 64 base pairs. Genotype  
634 likelihoods at the ascertained sites were then determined for all individuals (including those with  
635 low sequencing depth; n=77) using ANGSD with the same filtering options as before. In addition  
636 to the genotype likelihoods for the full set of individuals, we also used a genotype likelihood  
637 dataset comprising only *Turdus poliocephalus* individuals. We excluded *T. p. canescens* from  
638 further analysis, as it had low sequencing depth (= 0.74) and low coverage (0.47); preliminary  
639 investigations indicated a high error rate for this individual (i.e., negative pairwise  $F_{ST}$  values,  
640 and large pairwise distances, to all other individuals). We did not call SNPs for *T. p.*  
641 *hygroscopus*, which was a last-minute addition to the dataset. Both *T. p. canescens* and *T. p.*  
642 *hygroscopus* were included in the phylogenetic analysis of mitochondrial genome data (see  
643 Materials and methods: Phylogenetic analyses: Phylogenetic analysis of mitochondrial genome  
644 data).

645

### 646 **Phylogenetic analyses**

647

## 648 **Phylogenetic analysis of SNP data**

649 We constructed genome-wide trees both from pairwise distances and from pairwise  $F_{ST}$ , using *T.*  
650 *merula* as an outgroup to root the trees. Pairwise distances were calculated from genotype  
651 likelihoods using ngsDist (Vieira et al. 2016). Pairwise  $F_{ST}$  was calculated from genotype  
652 likelihoods using the folded joint (2D) allele frequency spectrum (Nielsen et al. 2012), as  
653 implemented in ANGSD (Korneliussen et al. 2014), configured to use the default Reynolds et al.  
654 (1983)  $F_{ST}$  estimator.

655 Trees were estimated from distance matrices using neighbor-joining (Saitou and Nei  
656 1987), followed by subtree pruning and regrafting, as implemented in FastME (Lefort et al.  
657 2015). In addition to constructing a whole-data pairwise distance tree, we obtained 100 bootstrap  
658 replicates of the pairwise distance matrix from ngsDist, configured to use blocks of 1500 SNPs  
659 (for an expected block size of 96 kbp), and constructed neighbor-joining trees for each replicate.  
660 Bootstrap support values were then assigned to internal nodes of the whole-data tree using  
661 RAxML (Stamatakis 2014). We note that bootstrap support values only indicate how consistent  
662 the data are across the genome, and do not reflect uncertainty of relationships due to e.g. gene  
663 flow or incomplete lineage sorting.

664

## 665 **Phylogenetic analysis of mitochondrial genome data**

666 We performed a Bayesian phylogenetic analysis of the newly generated mitochondrial genome  
667 data, supplemented with Genbank data from 12 additional outgroup taxa from the family  
668 Turdidae (see Supplementary File 1). Two island thrush taxa are included here that were  
669 excluded from the phylogenetic analyses described above due to poor quality SNP data (*T. p.*  
670 *canescens*) or lacking SNP data (*T. p. hygroscopus*). We excluded two mitochondrial genomes  
671 with suspected pseudogene contamination (*T. merula* and *T. poliocephalus papuensis* ZMUC  
672 192303).

673 We built individual alignments for cytochrome *b* (*cyt-b*), NADH dehydrogenase 2  
674 (ND2), and the remainder of the mitochondrial genome using MAFFT (Kato et al. 2002) as  
675 implemented in SEAVIEW (Gouy et al. 2010). Subsequently, we analyzed the concatenated  
676 datasets, with *cyt-b* and ND2 partitioned, in BEAST v1.8.4 (Drummond et al. 2012) using the  
677 GTR nucleotide substitution model. We used a relaxed uncorrelated lognormal distribution for

678 the molecular clock model, and assumed a birth-death speciation process as a tree prior.  
679 *Myadestes myadestinus* was set as the outgroup. The Markov chain Monte Carlo (MCMC)  
680 algorithm was run three times for 200 million iterations, with trees sampled every 10,000th  
681 generation. Convergence of individual runs was assessed using Tracer 1.6 (Rambaut et al. 2014),  
682 ensuring all ESS > 200, and graphically estimating an appropriate burn-in (55 million  
683 generations). TreeAnnotator 1.8.2 (Rambaut and Drummond 2015) was used to summarize a  
684 single maximum clade credibility (MCC) tree using mean node heights. To obtain absolute dates,  
685 we followed substitution rate estimates from Lerner et al. (2011), which derive from analysis of a  
686 Passerides songbird radiation across Pacific islands. We applied a rate of 0.0145 substitutions per  
687 site per lineage (2.9%) per Myr to our ND2 data; and a rate of 0.007 substitutions per site per  
688 lineage (1.4%) per Myr to our *cyt-b* data.

689

### 690 **Population structure and heterozygosity levels**

691 Population structure was analyzed for the island thrush, excluding outgroups, using PCAngsd  
692 (Meisner and Albrechtsen 2018). We performed a principal component analysis to explore the  
693 genetic differentiation represented in the data. A covariance matrix was estimated from genotype  
694 likelihoods, configured to exclude sites with minor allele frequency <0.05 and sites not in Hardy-  
695 Weinberg equilibrium. The PCAngsd minimum average partial (MAP) test was used to calculate  
696 the number of dimensions required to explain the population structure in this dataset. To account  
697 for individual variation in heterozygosity, we normalized the covariance matrix to obtain a  
698 correlation matrix, and then visualized the result as a heatmap. We used a latent mixed-  
699 membership model implemented in PCAngsd to estimate ancestry proportions for k=2 to k=8  
700 ancestral components. Heterozygosity was calculated from the site allele frequency spectrum for  
701 each individual, as estimated by ANGSD.

702

### 703 **Gene flow**

704 We used D-statistics (Green et al. 2010, Patterson et al. 2012) to test for differential gene flow  
705 between populations. The  $D_b(C)$  statistic is the D-statistic analogue of Malinsky et al.'s (2018)  
706  $f_b(C)$  statistic,

707

$$708 \quad D_b(C) = \text{median}_A[\text{min}_B[D(A, B, C, O)]]$$

709  
710 which minimizes over all clades B that are descendants of  $b$ , and takes the median over all clades  
711 A that are descendants of  $b$ 's sister branch  $a$ . To obtain this statistic, we first computed D-  
712 statistics of the form  $D(A, B, C, T. merula)$  for all sets of three individuals A, B, C that were  
713 consistent with the tree presented in Fig. 1, with the order of A and B chosen so that each  
714 statistic was positive. Computing D-statistics from genotype likelihoods using ANGSD was not  
715 computationally feasible. Instead, we first made hard genotype calls on the autosomal scaffolds  
716 (those with length > 100 kbp) using BCFtools call -m (Li 2011). Pseudohaploid genotypes were  
717 then obtained for each individual by taking the majority read at sites called as biallelic, excluding  
718 transversions (C-T or G-A substitutions) and sites within 10 bp of an indel call  
719 (<https://github.com/grahamgower/eig-utils>). Significance of the D-statistics were assessed via  
720 bootstrapping, with each bootstrap replicate obtained by sampling scaffolds with replacement to  
721 match the length of the autosome (544 mbp; see Table S2). To account for multiple testing, p-  
722 values were Holm-Bonferroni adjusted to achieve a family-wise error rate (FWER) of 0.05. We  
723 used Dsuite (Malinsky et al. 2021) to calculate the  $D_b(C)$  statistics from our pairwise-distance  
724 tree and precalculated D-statistics, then plotted the results using Dsuite's dttools.py script.

725

## 726 **Demographic history inference using PSMC**

727 We used the pairwise sequentially Markovian coalescent method (PSMC; Li and Durbin 2011)  
728 to infer the demographic histories of the island thrush and its relatives. PSMC uses the  
729 distribution of heterozygous sites across the genome of a single individual to infer the  
730 demographic history of an entire population or species. The method estimates the distribution of  
731 the time since the most recent common ancestor (TMRCA) of each allele pair at all loci, and uses  
732 this to estimate effective population size changes over time.

733 We performed individual PSMC analyses for all ingroup and outgroup taxa, including the  
734 *T. merula de novo* assembly. Non-autosomal regions were excluded, and variants were called  
735 with the mpileup and call -c subcommands in BCFtools (independently of the genotype calling  
736 described in Materials and methods: Gene flow). We filtered out sites where read depth was less  
737 than 10 or more than 100, sites with Phred quality scores below 20, and sites near indels. We  
738 then used the 'consensus' command in BCFtools to incorporate all variants into a single  
739 sequence using IUPAC codes. Next, the consensus sequence was divided into non-overlapping



740 100 bp bins, which were scored either as heterozygous (if there was at least one heterozygote  
741 nucleotide position in the bin), or homozygous. When running PSMC, the total number of  
742 expectation-maximization iterations was set to 25; T max (-t) was set to 15; the initial  
743 mutation/recombination ratio (-r) was set to 5; and the atomic time interval pattern (-p) was set to  
744 “4+25\*2+4+6”. Results were scaled using a generation time of two years and a mutation rate of  
745  $3 \times 10^{-9}$  per nucleotide per generation, based on the rates reported for passerine birds by  
746 Nadachowska-Brzyska et al. (2015).

747

### 748 **Geographic distance vs. genetic distance**

749 A positive relationship between pairwise geographic distance and genetic distance indicates  
750 isolation by distance (Slatkin 1987, 1993), a pattern that can result from stepping stone  
751 colonization (Cibois et al. 2011; Irestedt et al. 2013). To test this for the island thrush, we  
752 performed a Mantel test (10,000 permutations) using the ape package (Paradis and Schliep 2019)  
753 in R v3.5.2 (R Core Team 2018).

754

### 755 **Colonization in light of Pleistocene land bridge formation**

756 Pleistocene glacial cycles caused repeated drops in global sea levels, sometimes by as much as  
757 120 m. This resulted in periodic land bridge connections between many Indo-Pacific islands  
758 (Voris 2000). To evaluate whether these connections facilitated inter-island colonization by the  
759 island thrush, we inferred which populations shared subaerial connections during the Pleistocene.  
760 Populations separated by water barriers deeper than 120 m were considered not to have been  
761 connected. These data were plotted across the tips of the pairwise distance tree.

762

### 763 **Sexual dichromatism**

764 In addition to high variation in plumage coloration and patterning, the island thrush represents a  
765 mosaic of sexually dichromatic and monochromatic populations. We used data from a  
766 comprehensive morphological study of the species by Peterson (2007) to determine how often  
767 sexually dichromatism arose by convergence. Peterson measured dichromatism as light, strong,  
768 or absent, but since only two taxa showed ‘strong’ dimorphism, including *T. (poliocephalus)*  
769 *niveiceps*, which is not an island thrush (Nylander et al. 2008), we scored dichromatism only as

770 present or absent. Dichromatism scores were plotted across the tips of the pairwise distance tree;  
771 we were able to apply scores to 55 of 68 populations.

772

773

## 774 **SUPPLEMENTARY MATERIAL**

775 **Supplementary File 1.** Specimen and sequence data accession information.

776 **Supplementary File 2.** Figures S1–12 and Tables S1–2.

777 **Supplementary File 3.** Post-mortem damage.

778 **Supplementary File 4.** PSMC plots.

779 **Supplementary File 5.** Data quality information and metadata.

780

781

## 782 **ACKNOWLEDGMENTS**

783 Generous sample loans from several museums provided the basis for this study. We thank the  
784 American Museum of Natural History, New York, NY (Paul Sweet, Tom Trombone and Peter  
785 Capainolo); the British Museum of Natural History, Tring, UK (Robert Prys-Jones, Hein van  
786 Grouw and Mark Adams); the Burke Museum, Seattle, WA (Sharon Birks); the Cincinnati  
787 Museum Center, OH (Emily Imhoff); the Field Museum of Natural History, Chicago, IL (Ben  
788 Marks); the Natural History Museum of Denmark (Jan Bolding Kristensen); the Queensland  
789 Museum, South Brisbane, Australia (Heather Janetzki, Paul Oliver); Rijksmuseum van  
790 Natuurlijke Histoire, Leiden, the Netherlands (Steven van der Mije and Pepijn Kamminga); the  
791 Smithsonian Institution National Museum of Natural History, Washington, D.C. (Christopher  
792 Milensky); the Swedish Museum of Natural History, Stockholm (Ulf Johansson); and the Yale  
793 Peabody Museum of Natural History, New Haven, CT (Kristof Zyskowski). Leo Joseph,  
794 Frederick Sheldon, and Trevor Price provided valuable comments on the draft manuscript. We  
795 thank Thorfinn Korneliussen for adding folded 2D-SFS support into ANGSD. This work was  
796 supported by the Carlsberg Foundation (grant numbers CF15-0078 and CF15-0079 to K.A.J.);  
797 and the Villum Foundation (Young Investigator Programme grant number 15560 to K.A.J., and  
798 grant number 00025300 to F.R.). The authors acknowledge support from the National Genomics  
799 Infrastructure in Stockholm, funded by Science for Life Laboratory, the Knut and Alice  
800 Wallenberg Foundation and the Swedish Research Council. We also thank SNIC/Uppsala

801 Multidisciplinary Center for Advanced Computational Science for assistance with massively  
802 parallel sequencing, and access to the UPPMAX computational infrastructure.

803

804

### 805 **AUTHOR CONTRIBUTIONS**

806 A.H.R. and K.A.J. conceived the study. All authors contributed to build the dataset. A.H.R.,  
807 G.G., F.R., and K.A.J. developed the analytical framework. G.G., M.P.K.B., B.P., and F.R.  
808 performed bioinformatics. G.G. and J.M.P. performed the phylogenomic analyses with input  
809 from A.H.R., F.R., and K.A.J. A.H.R. led the writing, and all authors contributed to the  
810 discussion of the results and the writing of the manuscript.

811

812

### 813 **DATA AVAILABILITY**

814 Raw Illumina sequences and the *Turdus merula* genome assembly are deposited in the Sequence  
815 Reads Archive, National Center for Biotechnology Information, SRA accession [pending]. Some  
816 mitochondrial genome sequence data was downloaded from Genbank; accession numbers are  
817 provided in Supplementary File 1.

818

819

### 820 **REFERENCES**

821 Andersen MJ, Nyári ÁS, Mason I, Joseph L, Dumbacher JP, Filardi CE, Moyle, RG. 2014.  
822 Molecular systematics of the world's most polytypic bird: the *Pachycephala pectoralis/melanura*  
823 (Aves: Pachycephalidae) species complex. *J Linn Soc Lond Zool.* 170:566–588.

824

825 Andersen MJ, Oliveros CH, Filardi CE, Moyle RG. 2013. Phylogeography of the Variable  
826 Dwarf-Kingfisher *Ceyx lepidus* (Aves: Alcedinidae) inferred from mitochondrial and nuclear  
827 DNA sequences. *Auk.* 130:118–131.

828

829 Andersen MJ, Shult HT, Cibois A, Thibault JC, Filardi CE, Moyle, RG. 2015. Rapid  
830 diversification and secondary sympatry in Australo-Pacific kingfishers (Aves: Alcedinidae:  
831 *Todiramphus*). *R Soc Open Sci.* 2:140375.

832  
833 Andrews S. 2010. FastQC: a quality control tool for high throughput sequence data. Available  
834 from: <http://www.bioinformatics.babraham.ac.uk/projects/fastqc>  
835  
836 Badyaev AV, Hill GE. 2003. Avian sexual dichromatism in relation to phylogeny and ecology.  
837 *Annu Rev Ecol Evol Syst.* 34:27–49.  
838  
839 Batista R, Olsson U, Andermann T, Aleixo A, Ribas CC, Antonelli A. 2020. Phylogenomics and  
840 biogeography of the world's thrushes (Aves, *Turdus*): new evidence for a more parsimonious  
841 evolutionary history. *Proc R Soc Lond B Biol Sci.* 287:20192400.  
842  
843 Beehler BM, Pratt TK. 2016. Birds of New Guinea: distribution, taxonomy, and systematics.  
844 Princeton (NJ): Princeton University Press.  
845  
846 Benjamini Y, Speed TP. 2012. Summarizing and correcting the GC content bias in high-  
847 throughput sequencing. *Nucleic Acids Res.* 40:e72.  
848  
849 Bolger AM, Lohse M, Usadel B. 2014. Trimmomatic: a flexible trimmer for Illumina sequence  
850 data. *Bioinformatics.* 30:2114–2120.  
851  
852 Boyle WA. 2008. Can variation in risk of nest predation explain altitudinal migration in tropical  
853 birds?. *Oecologia.* 155:397–403.  
854  
855 Broad Institute 2019. Picard toolkit. Available from: <http://broadinstitute.github.io/picard/>  
856  
857 Cibois A, Beadell JS, Graves GR, Pasquet E, Slikas B, Sonsthagen SA, Thibault J-C, Fleischer  
858 RC. 2011. Charting the course of reed-warblers across the Pacific islands. *J Biogeogr.* 38:1963–  
859 1975.  
860  
861 Clement P, Hathway R. 2000. Thrushes. London (GB): Christopher Helm.  
862

- 863 Clements JF, Schulenberg TS, Iliff MJ, Billerman SM, Fredericks TA, Sullivan BL, Wood CL.  
864 2019. The eBird/Clements Checklist of Birds of the World: v2019. Available from:  
865 <https://www.birds.cornell.edu/clementschecklist/download/>  
866
- 867 Coates BJ, Bishop KD. 1997. A guide to the birds of Wallacea. Alderley (QLD): Dove  
868 Publications.  
869
- 870 Collar NJ. 2005. Family Turdidae (Thrushes). In: del Hoyo J, Elliott A, Christie D, editors.  
871 Handbook of the Birds of the World vol. 10. Barcelona (CAT): Lynx Edicions. p. 514–807.  
872
- 873 Darwin C. 1859. On the origin of species by means of natural selection, or, the preservation of  
874 favoured races in the struggle for life. London (GB): J. Murray.  
875
- 876 Diamond JM. 1975. Assembly of Species Communities. In: Cody M.L, Diamond J, editors.  
877 Ecology and Evolution of Species Communities. Cambridge (MA): Harvard University Press. p.  
878 342-444.  
879
- 880 Diamond JM, Gilpin ME. 1983. Biogeographic umbilici and the origin of the Philippine  
881 avifauna. *Oikos*. 41:307–321.  
882
- 883 Diamond JM, Gilpin ME, Mayr E. 1976. Species-distance relation for birds of the Solomon  
884 Archipelago, and the paradox of the great speciators. *Proc Natl Acad Sci U S A*. 73:2160–2164.  
885
- 886 Dickinson EC, Christidis L, editors. 2014. The Howard and Moore complete checklist of the  
887 birds of the world. 4<sup>th</sup> ed. vol. 2. Passerines. Eastbourne (GB): Aves Press.  
888
- 889 Drummond AJ, Suchard MA, Xie D, Rambaut A. 2012. Bayesian phylogenetics with BEAUti  
890 and the BEAST 1.7. *Mol Biol Evol*. 29:1969–1973.  
891
- 892 Dutson G. 2011. Birds of Melanesia: Bismarcks, Solomons, Vanuatu and New Caledonia.  
893 London (GB): Christopher Helm.

894  
895 Ericson PG, Qu Y, Rasmussen PC, Blom MP, Rheindt FE, Irestedt M. 2019. Genomic  
896 differentiation tracks earth-historic isolation in an Indo-Australasian archipelagic pitta (Pittidae;  
897 Aves) complex. *BMC Evol Biol.* 19:1–13.  
898  
899 Garg KM, Chattopadhyay B, Koane B, Sam K, Rheindt FE. 2020. Last Glacial Maximum led to  
900 community-wide population expansion in a montane songbird radiation in highland Papua New  
901 Guinea. *BMC Evol Biol.* 20:1–10.  
902  
903 Gill F, Donsker D, Rasmussen P, editors. 2020. IOC World Bird List (v10.2). doi:  
904 10.14344/IOC.ML.10.2.  
905  
906 Gouy M, Guindon S, Gascuel O. 2010. SeaView version 4: a multiplatform graphical user  
907 interface for sequence alignment and phylogenetic tree building. *Mol Biol Evol.* 27:221–224.  
908  
909 Gower G, Fenderson LE, Salis AT, Helgen KM, van Loenen AL, Heiniger H, Hofman-  
910 Kamińska E, Kowalczyk R, Mitchell KJ, Llamas B, et al. 2019. Widespread male sex bias in  
911 mammal fossil and museum collections. *Proc Natl Acad Sci U S A.* 116:19019–19024.  
912  
913 Green RE, Krause J, Briggs AW, Maricic T, Stenzel U, Kircher M, Patterson N, Li H, Zhai W,  
914 Fritz MH, et al. 2010. A draft sequence of the Neandertal genome. *Science.* 328:710–722.  
915  
916 Gurevich A, Saveliev V, Vyahhi N, Tesler G. 2013. QUASt: quality assessment tool for genome  
917 assemblies. *Bioinformatics (Oxf).* 29:1072–1075.  
918  
919 Gwee, CY, Garg, KM, Chattopadhyay, B, Sadanandan, KR, Prawiradilaga, DM, Irestedt, M, Lei  
920 F, Bloch LM, Lee JGH, Irham M, et al. 2020. Phylogenomics of white-eyes, a ‘great speciator’,  
921 reveals Indonesian archipelago as the center of lineage diversity. *eLife.* 9:e62765.  
922  
923 Hewitt G. 2000. The genetic legacy of the Quaternary ice ages. *Nature.* 405:907–913.  
924

- 925 Irestedt M, Fabre PH, Batalha-Filho H, Jønsson KA, Roselaar CS, Sangster G, Ericson PG. 2013.  
926 The spatio-temporal colonization and diversification across the Indo-Pacific by a ‘great  
927 speciator’ (Aves, *Erythropitta erythrogaster*). *Proc R Soc Biol Sci Ser B*. 280:20130309.  
928
- 929 Jankowski JE, Londoño GA, Robinson SK, Chappell MA. 2013. Exploring the role of  
930 physiology and biotic interactions in determining elevational ranges of tropical animals.  
931 *Ecography*. 36:1–12.  
932
- 933 Jones AW, Kennedy RS. 2008. Plumage convergence and evolutionary history of the Island  
934 Thrush in the Philippines. *Condor*. 110:35–44.  
935
- 936 Jønsson KA, Irestedt M, Christidis L, Clegg SM, Holt BG, Fjeldså J. 2014. Evidence of taxon  
937 cycles in an Indo-Pacific passerine bird radiation (Aves: *Pachycephala*). *Proc R Soc Biol Sci Ser*  
938 *B*. 281:20131727.  
939
- 940 Katoh K, Misawa K, Kuma KI, Miyata T. 2002. MAFFT: a novel method for rapid multiple  
941 sequence alignment based on fast Fourier transform. *Nucleic Acids Res*. 30:3059–3066.  
942
- 943 Kearns AM, Joseph L, Austin JJ, Driskell AC, Omland KE. 2020. Complex mosaic of sexual  
944 dichromatism and monochromatism in Pacific robins results from both gains and losses of  
945 elaborate coloration. *J Avian Biol*. 51:1–19.  
946
- 947 Kennedy R, Gonzales PC, Dickinson E, Miranda Jr HC, Fisher TH. 2000. A guide to the birds of  
948 the Philippines. New York (NY): Oxford University Press.  
949
- 950 Korneliussen TS, Albrechtsen A, Nielsen R. 2014. ANGSD: analysis of next generation  
951 sequencing data. *BMC Bioinformatics*. 15:1-13.  
952
- 953 Lawson DJ, Van Dorp L, Falush D. 2018. A tutorial on how not to over-interpret STRUCTURE  
954 and ADMIXTURE bar plots. *Nat. Commun*. 9:1–11.  
955

- 956 Lefort V, Desper R, Gascuel O. 2015. FastME 2.0: a comprehensive, accurate, and fast distance-  
957 based phylogeny inference program. *Mol Biol Evol.* 32:2798–2800.  
958
- 959 Lerner HR, Meyer M, James HF, Hofreiter M, Fleischer RC. 2011. Multilocus resolution of  
960 phylogeny and timescale in the extant adaptive radiation of Hawaiian honeycreepers. *Curr Biol.*  
961 21:1838–1844.  
962
- 963 Li H. 2011. A statistical framework for SNP calling, mutation discovery, association mapping  
964 and population genetical parameter estimation from sequencing data. *Bioinformatics (Oxf).*  
965 27:2987–2993.  
966
- 967 Li H. 2013. Aligning sequence reads, clone sequences and assembly contigs with BWA-MEM.  
968 arXiv. 1303.3997.  
969
- 970 Li H, Durbin R. 2011. Inference of human population history from individual whole-genome  
971 sequences. *Nature.* 475:493–496.  
972
- 973 Li H, Handsaker B, Wysoker A, Fennell T, Ruan J, Homer N, Marth G, Abecasis G, Durbin R.  
974 2009. The sequence alignment/map format and SAMtools. *Bioinformatics (Oxf.).* 25:2078–2079.  
975
- 976 MacArthur RH, Wilson EO. 1967. The theory of island biogeography. Princeton (NJ): Princeton  
977 University Press.  
978
- 979 MacKinnon J, Phillipps K. 1993. A field guide to the birds of Borneo, Sumatra, Java, and Bali.  
980 New York (NY): Oxford University Press.  
981
- 982 Malinsky M, Matschiner M, Svardal H. 2021. Dsuite-Fast D-statistics and related admixture  
983 evidence from VCF files. *Mol Ecol Resour.* 21:584–595.  
984



- 985 Malinsky M, Svardal H, Tyers AM, Miska EA, Genner MJ, Turner GF, Durbin R. 2018. Whole-  
986 genome sequences of Malawi cichlids reveal multiple radiations interconnected by gene flow.  
987 *Nat Ecol Evol.* 2:1940–1955.  
988
- 989 Manthey JD, Oliveros CH, Andersen MJ, Filardi CE, Moyle RG. 2020. Gene flow and rapid  
990 differentiation characterize a rapid insular radiation in the southwest Pacific (Aves: *Zosterops*).  
991 *Evolution.* 74:1788–1803.  
992
- 993 Mayr E. 1942. Systematics and the origin of species, from the viewpoint of a zoologist.  
994 Cambridge (MA): Harvard University Press.  
995
- 996 Mayr E. 1944. The birds of Timor and Sumba. *Bull. Am Mus Nat Hist.* 83:123–194.  
997
- 998 Mayr E, Diamond JM. 1976. Birds on islands in the sky: origin of the montane avifauna of  
999 northern Melanesia. *Proc Natl Acad Sci U S A.* 73:1765–1769.  
1000
- 1001 Mayr E, Diamond JM. 2001. The Birds of Northern Melanesia: Speciation, Ecology and  
1002 Biogeography. New York (NY): Oxford University Press.  
1003
- 1004 McKenna A, Hanna M, Banks E, Sivachenko A, Cibulskis K, Kernytsky A, Garimella K,  
1005 Altshuler D, Gabriel S, Daly M, et al. 2010. The Genome Analysis Toolkit: a MapReduce  
1006 framework for analyzing next-generation DNA sequencing data. *Genome Res.* 20:1297–1303.  
1007
- 1008 Meisner J, Albrechtsen A. 2018. Inferring population structure and admixture proportions in  
1009 low-depth NGS data. *Genetics.* 210:719–731.  
1010
- 1011 Meyer M, Arsuaga JL, de Filippo C, Nagel S, Aximu-Petri A, Nickel B, Martínez I, Gracia A, de  
1012 Castro JM, Carbonell E, et al. 2016. Nuclear DNA sequences from the Middle Pleistocene Sima  
1013 de los Huesos hominins. *Nature.* 531:504–507.  
1014

- 1015 Meyer M, Kircher M. 2010. Illumina sequencing library preparation for highly multiplexed  
1016 target capture and sequencing. *Cold Spring Harbor Protocols*. doi:10.1101/pdb.prot5448.  
1017
- 1018 Moyle RG, Filardi CE, Smith CE, Diamond J. 2009. Explosive Pleistocene diversification and  
1019 hemispheric expansion of a “great speciator”. *Proc Natl Acad Sci U S A*. 106:1863–1868.  
1020
- 1021 Moyle RG, Hosner PA, Jones AW, Outlaw DC. 2015. Phylogeny and biogeography of *Ficedula*  
1022 flycatchers (Aves: Muscicapidae): novel results from fresh source material. *Mol Phylogenet*  
1023 *Evol.* 82:87–94.  
1024
- 1025 Nadachowska-Brzyska K, Li C, Smeds L, Zhang G, Ellegren H. 2015. Temporal dynamics of  
1026 avian populations during Pleistocene revealed by whole-genome sequences. *Curr Biol.* 25:1375–  
1027 1380.  
1028
- 1029 Nadachowska-Brzyska K, Burri R, Smeds L, Ellegren H. 2016. PSMC analysis of effective  
1030 population sizes in molecular ecology and its application to black-and-white *Ficedula*  
1031 flycatchers. *Mol Ecol.* 25:1058–72.  
1032
- 1033 Nielsen R, Korneliussen T, Albrechtsen A, Li Y, Wang J. 2012. SNP calling, genotype calling,  
1034 and sample allele frequency estimation from new-generation sequencing data. *PloS One.*  
1035 7:e37558.  
1036
- 1037 Nursyifa C, Bruniche-Olsen A, Garcia-Erill G, Heller R, Albrechtsen A. 2021. Joint  
1038 identification of sex and sex-linked scaffolds in non-model organisms using low depth  
1039 sequencing data. bioRxiv. 433779.  
1040
- 1041 Nylander JA, Olsson U, Alström P, Sanmartín I. 2008. Accounting for phylogenetic uncertainty  
1042 in biogeography: a Bayesian approach to dispersal-vicariance analysis of the thrushes (Aves:  
1043 *Turdus*). *Syst Biol.* 57:257–268.  
1044

- 1045 Omland KE. 1997. Examining two standard assumptions of ancestral reconstructions: repeated  
1046 loss of dichromatism in dabbling ducks (Anatini). *Evolution*. 51:1636–1646.  
1047
- 1048 Paradis E, Schliep K. 2019. ape 5.0: an environment for modern phylogenetics and evolutionary  
1049 analyses in R. *Bioinformatics (Oxf)*. 35:526–528.  
1050
- 1051 Patterson N, Moorjani P, Luo Y, Mallick S, Rohland N, Zhan Y, Genschoreck T, Webster T,  
1052 Reich D. 2012. Ancient admixture in human history. *Genetics*. 192:1065–1093.  
1053
- 1054 Pedersen MP, Irestedt M, Joseph L, Rahbek C, Jønsson KA. 2018. Phylogeography of a ‘great  
1055 speciator’ (Aves: *Edolisoma tenuirostre*) reveals complex dispersal and diversification dynamics  
1056 across the Indo-Pacific. *J Biogeogr*. 45:826–837.  
1057
- 1058 Pepke ML, Irestedt M, Fjeldså J, Rahbek C, Jønsson KA. 2019. Reconciling supertramps, great  
1059 speciators and relict species with the taxon cycle stages of a large island radiation (Aves:  
1060 Campephagidae). *J Biogeogr*. 46:1214–1225.  
1061
- 1062 Peterson AT. 2007. Geographic variation in size and coloration in the *Turdus poliocephalus*  
1063 complex: a first review of species limits. *Sci Pap Nat Hist Mus Univ Kans*. 40:1–17.  
1064
- 1065 Petersen KR, Streett DA, Gerritsen AT, Hunter SS, Settles ML. 2015, September. Super  
1066 deduper, fast PCR duplicate detection in fastq files. In: Proceedings of the 6th ACM Conference  
1067 on Bioinformatics, Computational Biology and Health Informatics; 2015 Sep 9–12; Atlanta.  
1068 New York (NY): Association for Computing Machinery. p. 491–492.  
1069
- 1070 Pratt HD, Bruner PL, Berrett DG. 1987. A field guide to the birds of Hawaii and the tropical  
1071 Pacific. Princeton (NJ): Princeton University Press.  
1072
- 1073 Pujolar JM, Blom MP, Reeve AH, Kennedy JD, Marki PZ, Korneliussen TS, Freeman BG, Sam  
1074 K, Linck E, Haryoko T, et al. 2022. The formation of avian montane diversity across barriers and  
1075 along elevational gradients. *Nat Commun*. 13:1–13.

1076  
1077 R Core Team. 2018. R: A language and environment for statistical computing. Vienna: R  
1078 Foundation for Statistical Computing. Available from: <https://www.R-project.org>.  
1079  
1080 Ramachandran S, Deshpande O, Roseman CC, Rosenberg NA, Feldman MW, Cavalli-Sforza  
1081 LL. 2005. Support from the relationship of genetic and geographic distance in human  
1082 populations for a serial founder effect originating in Africa. *Proc Natl Acad Sci U S A*.  
1083 102:15942–15947.  
1084  
1085 Rambaut A, Drummond AJ. 2015. TreeAnnotator v1.8.2: MCMC Output analysis. Available  
1086 from: <http://beast.bio.ed.ac.uk>  
1087  
1088 Rambaut A, Suchard MA, Xie D, Drummond AJ. 2014. Tracer v1.6. Available from:  
1089 <http://beast.bio.ed.ac.uk>  
1090  
1091 Reeve AH, Blom MPK, Marki PZ, Batista R, Olsson U, Edmark VN, Irestedt M, Jønsson KA.  
1092 2022. The Sulawesi Thrush (*Cataponera turdoides*; Aves: Passeriformes) belongs to the genus  
1093 *Turdus*. *Zool Scr*. 51:32–40.  
1094  
1095 Rensch B, Heberer G, Lehmann W. 1930. Eine biologische reise nach den Kleinen Sunda-Inseln.  
1096 Berlin: Gebrüder Borntraeger.  
1097  
1098 Reynolds J, Weir BS, Cockerham CC. 1983. Estimation of the coancestry coefficient: basis for a  
1099 short-term genetic distance. *Genetics*. 105:767–779.  
1100  
1101 Rheindt FE, Prawiradilaga DM, Ashari H, Gwee CY, Lee GW, Wu MY, Ng, NS. 2020. A lost  
1102 world in Wallacea: Description of a montane archipelagic avifauna. *Science*. 367:167–170.  
1103  
1104 Ricklefs RE, Cox GW. 1978. Stage of taxon cycle, habitat distribution, and population density in  
1105 the avifauna of the West Indies. *Am Nat*. 112:875–895.  
1106

- 1107 Rolland J, Jiguet F, Jønsson KA, Condamine, FL, and Morlon, H. 2014. Settling down of  
1108 seasonal migrants promotes bird diversification. *Proc R Soc Lond B Biol Sci.* 281:20140473.  
1109
- 1110 Saitou N, Nei M. 1987. The neighbor-joining method: a new method for reconstructing  
1111 phylogenetic trees. *Mol Biol Evol.* 4:406–425.  
1112
- 1113 Simão FA, Waterhouse RM, Ioannidis P, Kriventseva EV, Zdobnov EM. 2015. BUSCO:  
1114 assessing genome assembly and annotation completeness with single-copy orthologs.  
1115 *Bioinformatics (Oxf).* 31:3210–3212.  
1116
- 1117 Skutch AF. 1985. Clutch size, nesting success, and predation on nests of Neotropical birds,  
1118 reviewed. *Ornithol Monogr.* 36:575–594.  
1119
- 1120 Slatkin M. 1987. Gene flow and the geographic structure of natural populations. *Science.*  
1121 236:787–792.  
1122
- 1123 Slatkin M. 1993. Isolation by distance in equilibrium and non-equilibrium populations.  
1124 *Evolution.* 47:264–279.  
1125
- 1126 Stamatakis A. 2014. RAxML version 8: a tool for phylogenetic analysis and post-analysis of  
1127 large phylogenies. *Bioinformatics (Oxf).* 30:1312–1313.  
1128
- 1129 Stresemann E. 1939. Die Vögel von Celebes. *J Ornithol.* 87:299–425.  
1130
- 1131 Vieira FG, Lassalle F, Korneliussen TS, Fumagalli M. 2016. Improving the estimation of genetic  
1132 distances from Next-Generation Sequencing data. *Biol J Linn Soc.* 117:139–149.  
1133
- 1134 Villard P, Duval T, Papineau C, Cassan JJ, Fuchs J. 2019. Notes on the biology of the threatened  
1135 Island Thrush *Turdus poliocephalus xanthopus* in New Caledonia. *Bird Conserv Int.* 29:616–  
1136 626.  
1137

1138 Voelker G, Rohwer S, Bowie RC, Outlaw DC. 2007. Molecular systematics of a speciose,  
1139 cosmopolitan songbird genus: defining the limits of, and relationships among, the *Turdus*  
1140 thrushes. *Mol Phylogenet Evol.* 42:422–434.  
1141  
1142 Voris HK. 2000. Maps of Pleistocene sea levels in Southeast Asia: shorelines, river systems and  
1143 time durations. *J Biogeogr.* 27:1153–1167.  
1144  
1145 Wallace AR. 1869. The Malay Archipelago: the land of the orang-utan and the bird of paradise; a  
1146 narrative of travel, with studies of man and nature. London (GB): Macmillan.  
1147  
1148 Weisenfeld NI, Kumar V, Shah P, Church DM, Jaffe DB. 2017. Direct determination of diploid  
1149 genome sequences. *Genome Res.* 27:757–767.  
1150  
1151 Zhang J, Kobert K, Flouri T, Stamatakis A. 2014. PEAR: a fast and accurate Illumina Paired-End  
1152 reAd mergeR. *Bioinformatics (Oxf).* 30:614–620.  
1153  
1154  
1155  
1156  
1157  
1158  
1159  
1160  
1161  
1162  
1163  
1164  
1165  
1166  
1167  
1168

1169 **FIGURES**

1170

1171

1172

1173

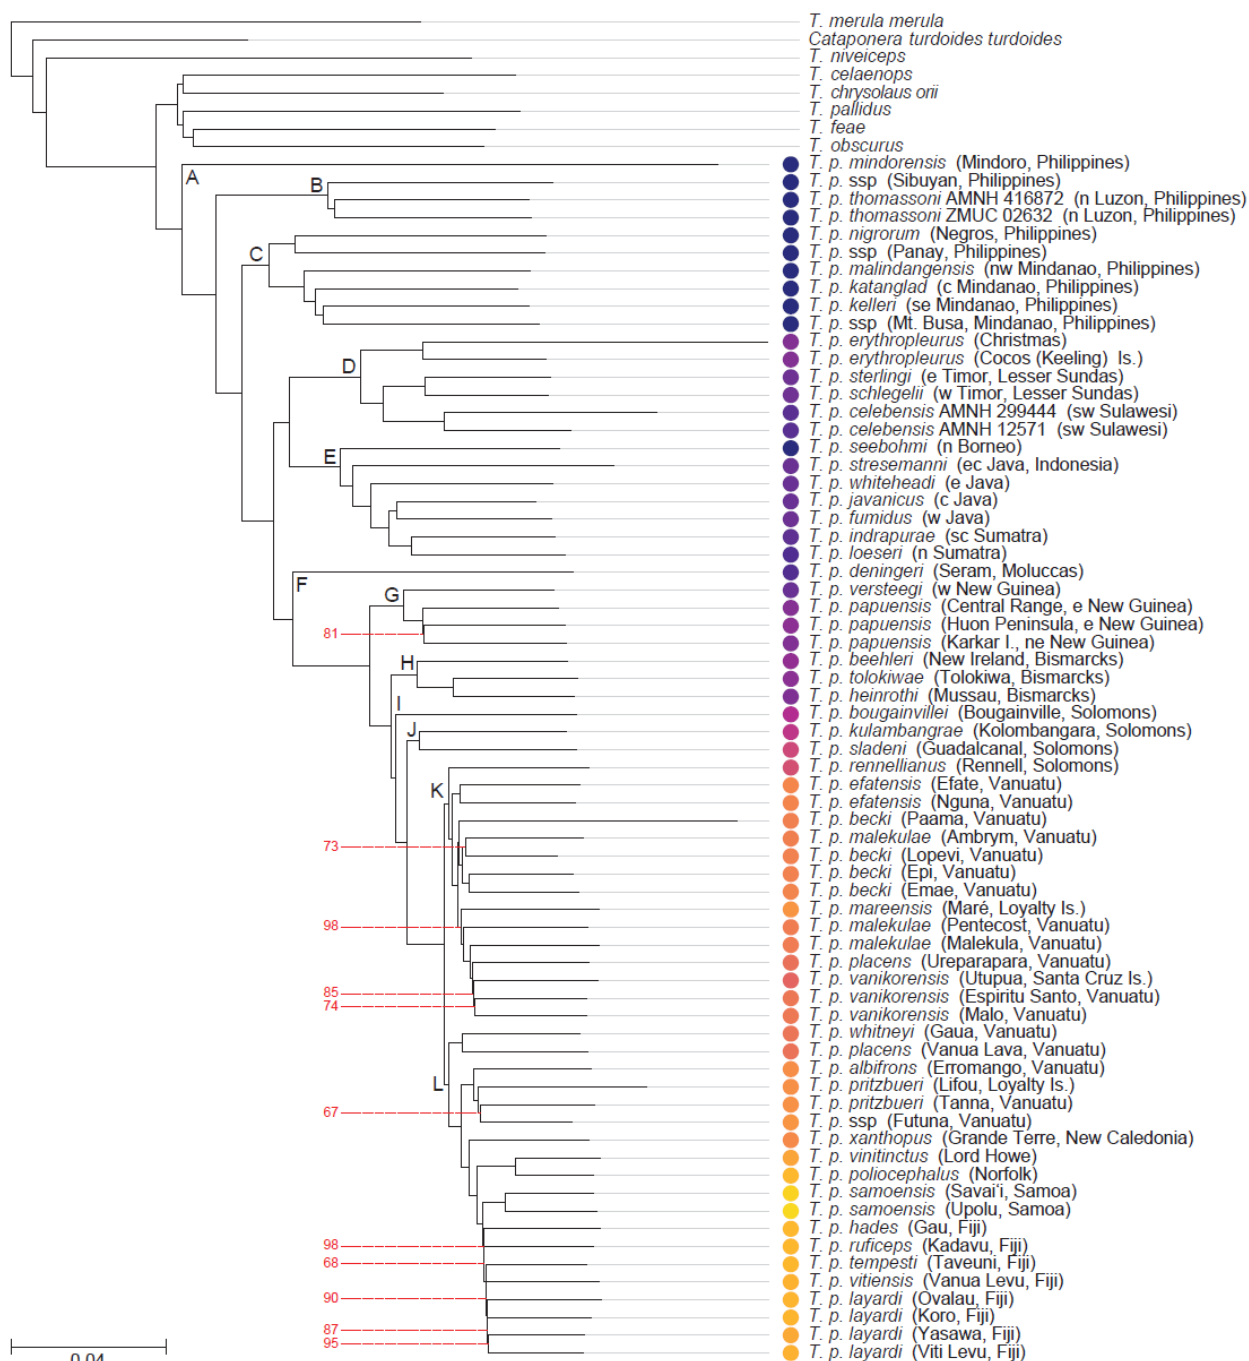

1174

1175

1176 **Fig. 1a.**

1177  
1178

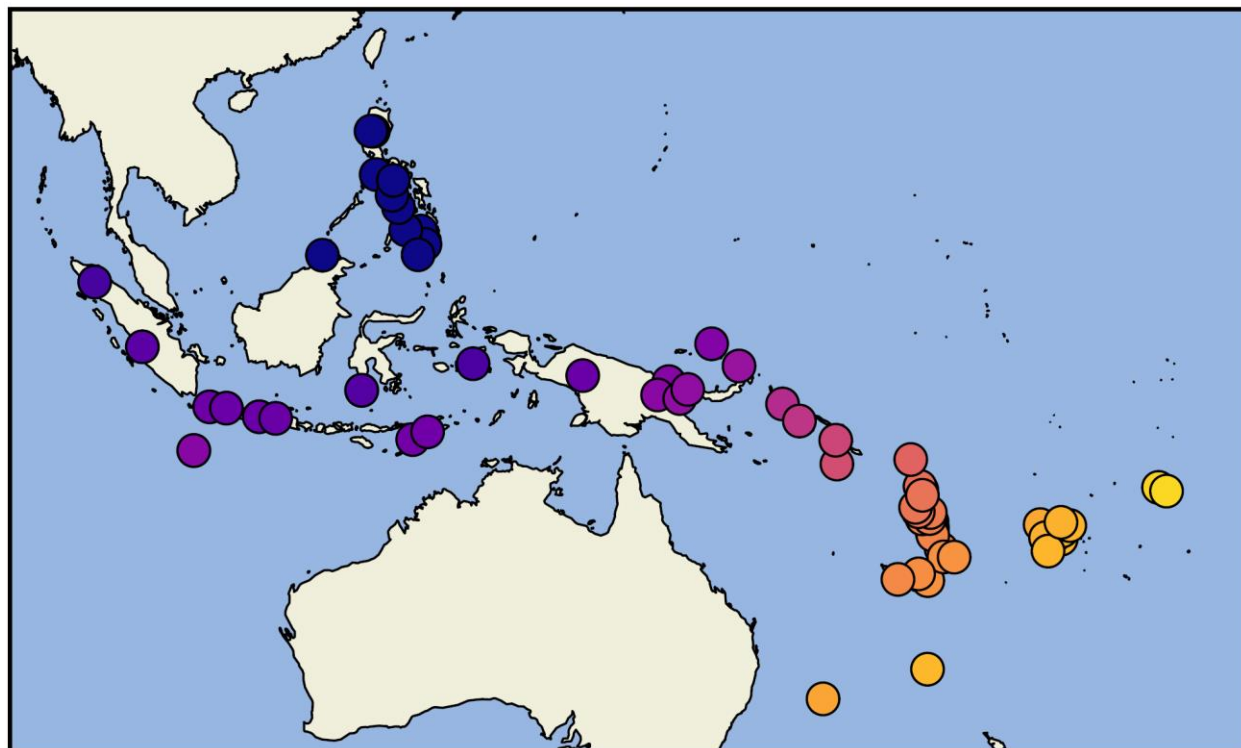

1179  
1180  
1181  
1182  
1183  
1184  
1185  
1186  
1187  
1188

**Fig. 1b.**

**Figs. 1a, 1b.** Phylogeny estimated from pairwise distances using neighbor-joining followed by subtree pruning and regrafting (Fig. 1a). Red lines indicate nodes with bootstrap support < 100% (from 100 non-parametric bootstrap replicates). Letters at nodes indicate clades referred to in the text. Leaf node colors on the tree match those used on the map (Fig. 1b). Island thrush individuals are colored by distance to a reference point at 30° N, 120° E, reflecting a hypothetical distribution of the species' mainland ancestor.



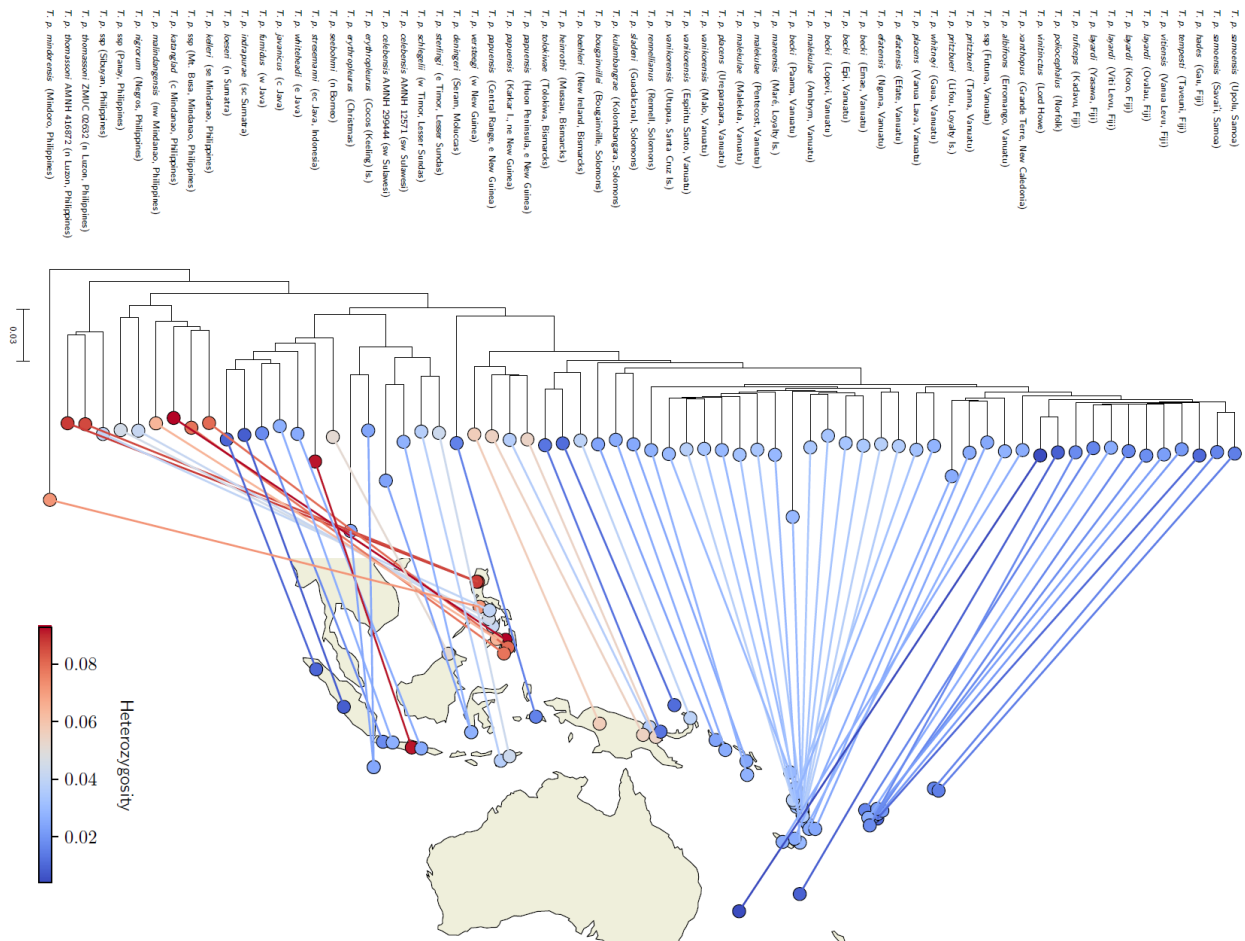

1189  
 1190 **Fig. 2.** Heterozygosity levels of individuals, overlaid upon the pairwise distance tree. Lines  
 1191 connect leaf nodes to the geographic origin of the individual; crossing of lines has been reduced  
 1192 by sorting the left and right branches of internal nodes by the mean longitude of their respective  
 1193 leaf nodes. The overall pattern suggests a serial founder effect from a radiation that proceeded  
 1194 from the Philippines.

1195  
 1196

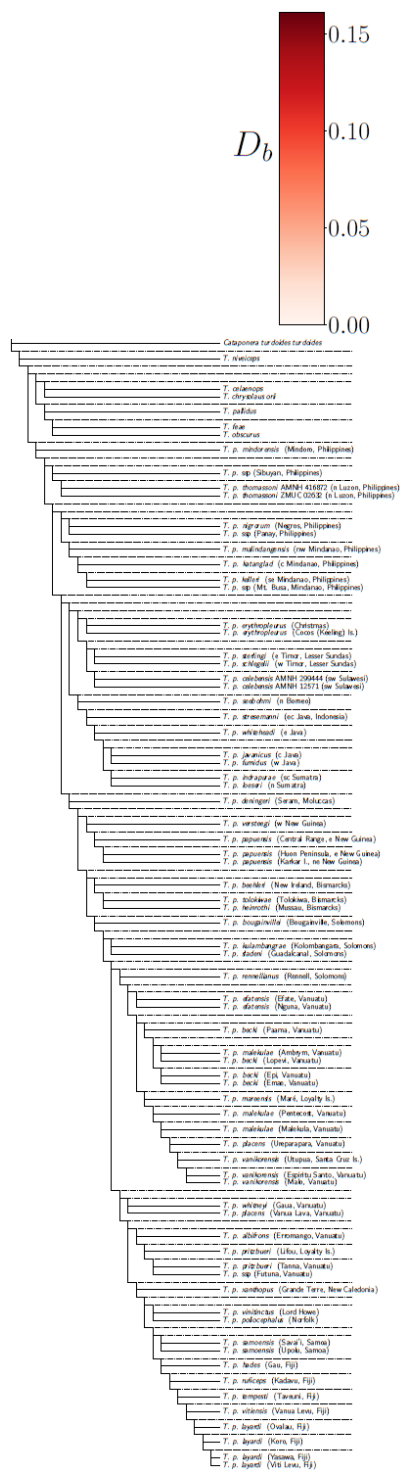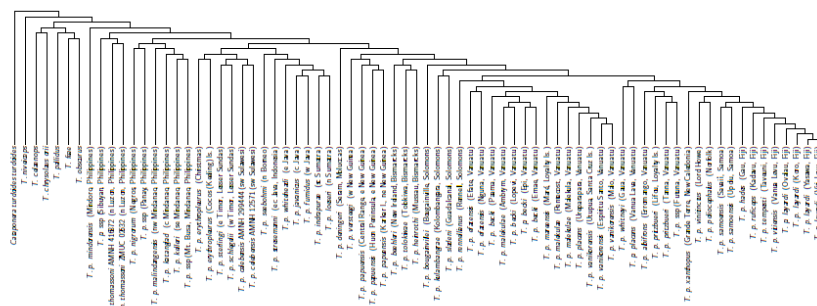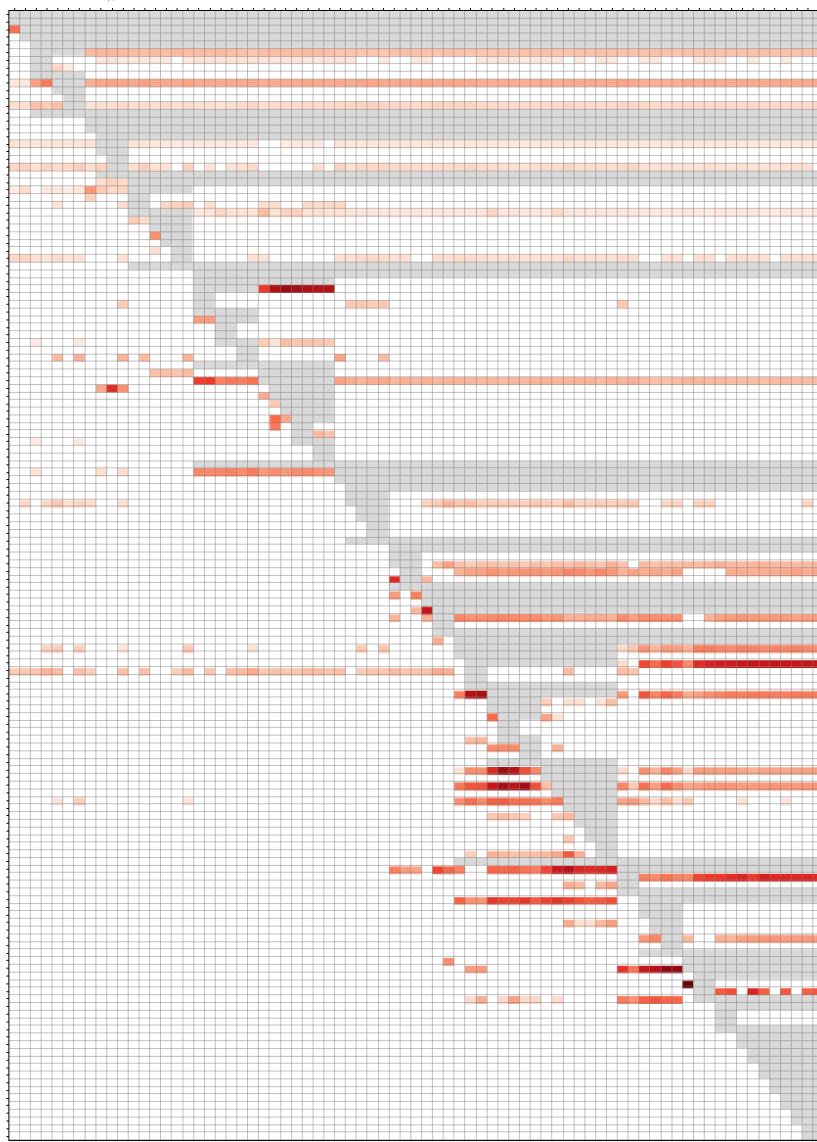

1197  
1198  
1199  
1200  
1201  
1202  
1203

1204 **Fig. 3.** Tree violating branches and potential gene flow. The  $D_b(C)$  statistic, analogous to the  
1205  $f_b(C)$  statistic from Malinsky et al. (2018), summarizes the results of all D-statistic tests D(A, B,  
1206 C, *T. merula*) that are consistent with the phylogenetic tree (Fig. 1).  $D_b(C)$  measures excess allele  
1207 sharing between individual (or ancestral node) C on the horizontal axis, and the branch of the  
1208 tree *b* on the vertical axis (compared with *b*'s sister clade *a*). Each grid cell indicates one  $D_b(C)$   
1209 statistic, where red cells correspond to significant values (more intense red indicates larger  $D_b(C)$   
1210 values), white cells are non-significant, and gray corresponds to cells for which no statistic is  
1211 consistent with the phylogenetic tree.

1212

1213

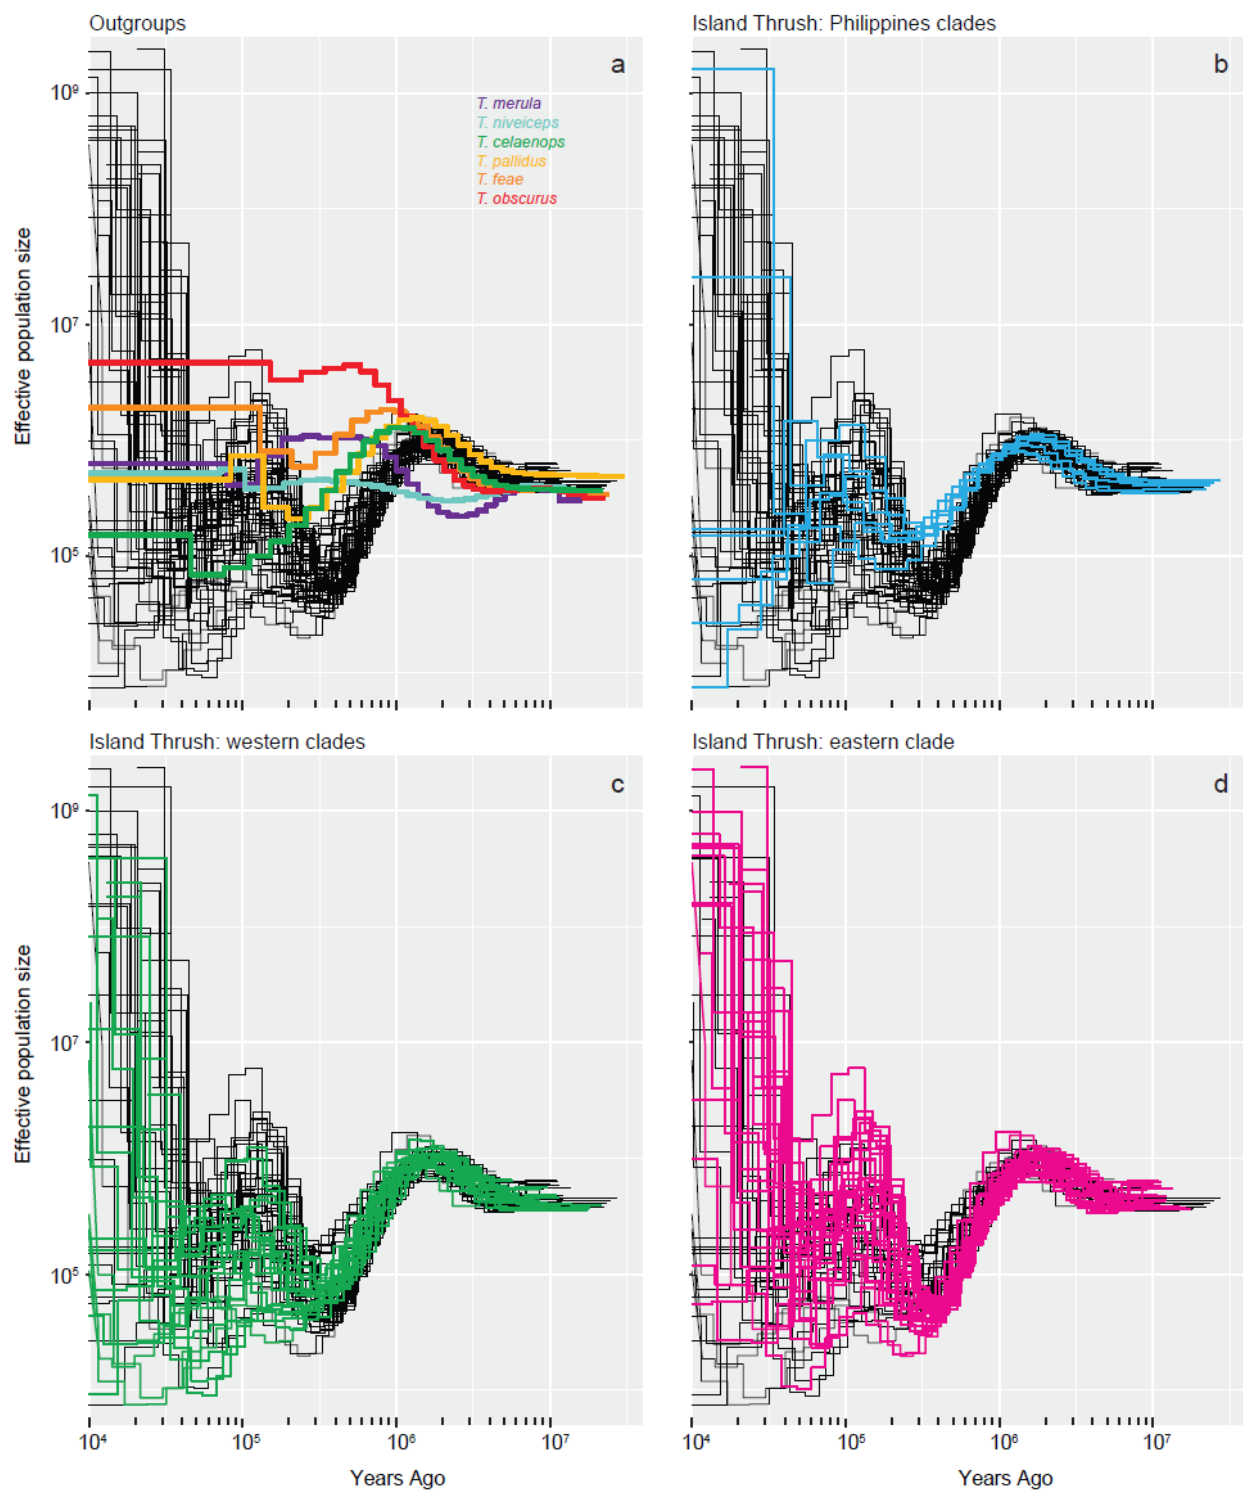

1214  
1215  
1216  
1217  
1218  
1219

1220 **Figs. 4a, 4b, 4c, 4d.** Pairwise sequentially Markovian coalescent (PSMC) plots illustrating  
1221 demographic changes (effective population size;  $N_e$ ) over time for the island thrush and related  
1222 *Turdus* thrushes. Generation time is set at two years. The four panels show curves from all island  
1223 thrush individuals analyzed (black lines, with groups of interest highlighted in color). **4a**  
1224 highlights outgroups; *T. celanops*, *T. pallidus*, *T. feae*, and *T. obscurus* belong to the island  
1225 thrush's East Asian sister clade. **4b** highlights Philippines populations, inferred to be those  
1226 earliest established. **4c** highlights all western clades outside the Philippines (Clades D–J in Fig.  
1227 1), as far east as the Solomons; and **4d** highlights the large eastern clade spanning southern  
1228 Melanesia, Tasman Sea islands, and Polynesia (corresponding to sister clades K and L in Fig. 1).  
1229 Individual  $N_e$  trajectories show little consistency more recently than c. 300 Kya, and within this  
1230 recent timespan there is no clear west vs. east regional pattern, or montane (**4c**) vs. lowland (**4d**)  
1231 pattern.  
1232  
1233  
1234

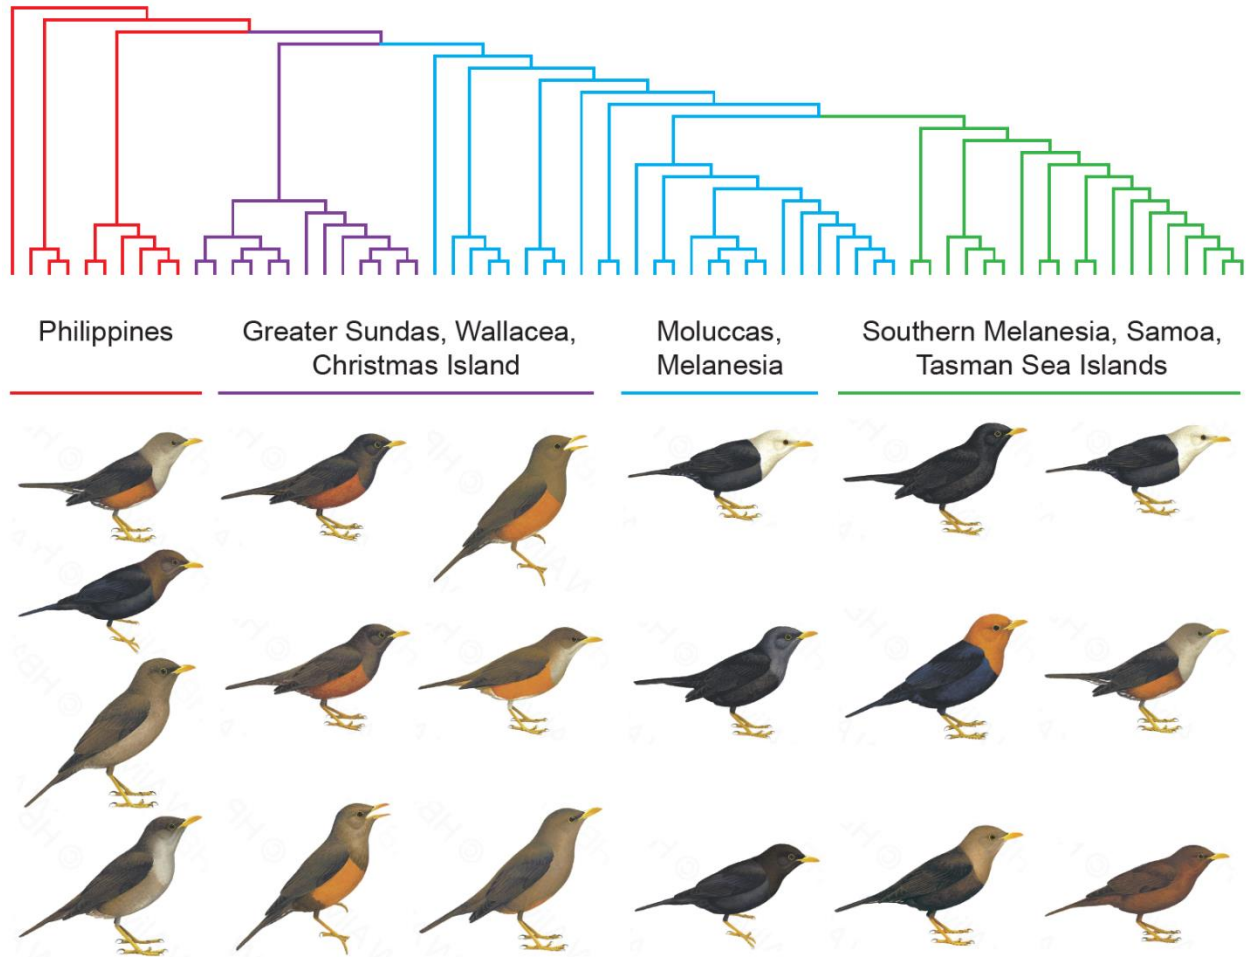

1235  
1236

1237 **Fig. 5.** Plumage variation in light of phylogeny and geography. Tree topology matches that in  
1238 Fig. 1. A selection of subspecies encompassing the range of male plumage variation found within  
1239 each of four geographic groups are shown (illustrations: Lynx Edicions). The tree is colored to  
1240 indicate the phylogenetic positions of those groups. The illustration of *T. p. albifrons* was used to  
1241 represent the similar-looking *T. p. deningeri*, and the illustration of *T. p. mindorensis* was used to  
1242 represent the similar-looking *T. p. layardi*.

1243
